# Supplementary material for: Evaluation of next generation sequencing platforms for population targeted sequencing studies
Source: Springer Nature journal article supplement (doi:10.1186/gb-2009-10-3-r32), 2009-03-27
Supplement: 13059_2008_2182_MOESM1_ESM.pdf [file 13059_2008_2182_MOESM1_ESM.pdf]

**Supplemental Table 1.** Summary of Roche 454, Illumina GA, and ABI SOLiD sequence reads. Raw reads were generated, filtered for quality, and then aligned to the reference sequence (Supplemental Methods). All subsequent analyses in this study are based on using the Newbler algorithm to align Roche 454 reads and the MAQ algorithm to align Illumina GA reads.

|              |                          | NA17156 |       | NA17275 |       | NA17460 |       | NA17773 |       |
|--------------|--------------------------|---------|-------|---------|-------|---------|-------|---------|-------|
| Roche<br>454 | No. raw sequence reads   | 47,968  |       | 31,669  |       | 71,580  |       | 46,244  |       |
|              | Alignment tool           | Newbler | BLAST | Newbler | BLAST | Newbler | BLAST | Newbler | BLAST |
|              | Aligned reads (% of raw) | 95.6    | 83.7  | 94.7    | 80.6  | 95.6    | 82.2  | 95.9    | 82.1  |

|                |                                  |           |       |           |       |           |       |           |       |
|----------------|----------------------------------|-----------|-------|-----------|-------|-----------|-------|-----------|-------|
| Illumina<br>GA | No. raw sequence reads           | 6,682,085 |       | 5,979,236 |       | 5,426,181 |       | 5,315,215 |       |
|                | Reads passing filters (% of raw) | 52.26     |       | 53.16     |       | 57.18     |       | 58.36     |       |
|                | Alignment tool                   | ELAND     | MAQ   | ELAND     | MAQ   | ELAND     | MAQ   | ELAND     | MAQ   |
|                | Aligned reads (% of filtered)    | 84.61     | 78.72 | 88.42     | 82.36 | 80.95     | 77.89 | 71.17     | 70.16 |

|              |                                  |            |  |            |  |            |  |            |  |
|--------------|----------------------------------|------------|--|------------|--|------------|--|------------|--|
| ABI<br>SOLiD | No. raw sequence reads           | 20,426,667 |  | 15,318,798 |  | 16,023,158 |  | 26,846,896 |  |
|              | Reads passing filters (% of raw) | 40.39      |  | 35.29      |  | 28.84      |  | 35.63      |  |
|              | Aligned reads (% of filtered)    | 96.71      |  | 96.51      |  | 95.84      |  | 96.63      |  |

**Supplemental Table 2.** Sequence coverage of targeted intervals in the four samples (Supplemental Methods).

|               | NA17156            | NA17275            | NA17460            | NA17773            |
|---------------|--------------------|--------------------|--------------------|--------------------|
| Targeted bp   | 266,201            |                    |                    |                    |
| Sequenced bp  | 251,973            | 255,057            | 266,201            | 266,201            |
| Analyzed bp   | 245,892            | 248,980            | 260,036            | 260,036            |
| Roche 454     |                    |                    |                    |                    |
| ≥10x          | 242,857<br>(98.77) | 243,085<br>(97.63) | 258,450<br>(99.39) | 257,623<br>(99.07) |
| 0x            | 0                  | 0                  | 0                  | 61                 |
| Avg. coverage | 43                 | 28                 | 61                 | 39                 |
| Illumina GA   |                    |                    |                    |                    |
| ≥10x          | 245,778<br>(99.95) | 248,960<br>(99.99) | 259,626<br>(99.84) | 258,578<br>(99.82) |
| 0x            | 0                  | 0                  | 0                  | 5                  |
| Avg. coverage | 203                | 263                | 157                | 130                |
| ABI SOLiD     |                    |                    |                    |                    |
| ≥10x          | 245,197<br>(97.2 ) | 248,112<br>(99.7)  | 259,427<br>(99.8)  | 259,272<br>(99.7)  |
| 0x            | 88                 | 153                | 138                | 85                 |
| Avg. coverage | 1036               | 671                | 537                | 1121               |

**Supplemental Table 3. Sequence coverage variability between amplicons.** The fold difference and distribution in sequence coverage between amplicons for each NGS technology (Supplemental Methods).

|             |         | Max  | 95th percentile | 5th percentile | Min  | 95th to 5th percentile ratio |
|-------------|---------|------|-----------------|----------------|------|------------------------------|
| Roche 454   | NA17156 | 1.68 | 1.37            | 0.63           | 0.28 | 2.16                         |
|             | NA17275 | 1.43 | 1.35            | 0.61           | 0.33 | 2.22                         |
|             | NA17460 | 2.11 | 1.52            | 0.62           | 0.48 | 2.46                         |
|             | NA17773 | 1.54 | 1.36            | 0.72           | 0.58 | 1.90                         |
| Illumina GA | NA17156 | 1.55 | 1.48            | 0.63           | 0.42 | 2.34                         |
|             | NA17275 | 1.42 | 1.34            | 0.49           | 0.43 | 2.74                         |
|             | NA17460 | 1.61 | 1.56            | 0.60           | 0.31 | 2.62                         |
|             | NA17773 | 1.53 | 1.24            | 0.57           | 0.34 | 2.17                         |
| ABI SOLiD   | NA17156 | 1.47 | 1.43            | 0.48           | 0.37 | 2.99                         |
|             | NA17275 | 1.41 | 1.31            | 0.75           | 0.73 | 1.74                         |
|             | NA17460 | 3.16 | 1.53            | 0.78           | 0.56 | 1.97                         |
|             | NA17773 | 1.89 | 1.64            | 0.60           | 0.40 | 2.75                         |

**Supplemental Table 4. Sequence coverage of repetitive elements.** Relative coverage of repetitive to unique sequences across the 260-kb analyzed interval. Standard deviation corresponds to the 4 samples variation.

|                        | bp per sample | Roche 454   | Illumina GA | ABI SOLiD   |
|------------------------|---------------|-------------|-------------|-------------|
| All repeats            | 101851        | 1.13+/-0.03 | 1.23+/-0.09 | 0.68+/-0.06 |
| LINE                   | 47030         | 1.25+/-0.06 | 0.78+/-0.03 | 0.56+/-0.03 |
| SINE                   | 33214         | 1.04+/-0.04 | 2.08+/-0.21 | 0.70+/-0.03 |
| Alu                    | 22263         | 1.02+/-0.06 | 2.63+/-0.3  | 0.56+/-0.03 |
| Simple repeats         | 2462          | 0.99+/-0.12 | 2.19+/-0.18 | 0.65+/-0.08 |
| Low Complexity repeats | 1051          | 0.89+/-0.09 | 0.84+/-0.08 | 0.48+/-0.14 |

**Supplemental Table 5A. No Coverage Regions.** Regions are counted multiple times if they have 0 coverage in more than one individual.

|             | No. of Regions | Total Number of base pairs with no coverage | Fraction of Regions that are Repetitive | % AT, averaged across regions |
|-------------|----------------|---------------------------------------------|-----------------------------------------|-------------------------------|
| Roche 454   | 1 <sup>a</sup> | 59                                          | 0/1                                     | 29%                           |
| Illumina GA | 2              | 5                                           | 2/2                                     | 58%                           |
| ABI SOLiD   | 40             | 464                                         | 30/40                                   | 90%                           |

**Supplemental Table 5B. Low Coverage Regions.** For details see Supplemental Table 6.

|             | No. of Regions | Total Length of Low Coverage Regions (bp) | Fraction of Regions that are Repetitive | % AT, averaged across regions |
|-------------|----------------|-------------------------------------------|-----------------------------------------|-------------------------------|
| Roche 454   | 1              | 4                                         | 0/1                                     | 25%                           |
| Illumina GA | 13             | 272                                       | 11/13                                   | 82%                           |
| ABI SOLiD   | 168            | 3415                                      | 128/168                                 | 85%                           |

<sup>a</sup>Raw 454 reads with low-quality bases aligned to the 59 bp interval, but no high-quality reads aligned to the this interval (see Supplemental Methods).

**Supplemental Table 6.** Detailed analysis of low and no coverage regions

| NGS                      | coverage type | NCBI36 coordinates       | coverage type details                                                    | Sequence                                                                                 | repeats                       | %AT            | length |    |
|--------------------------|---------------|--------------------------|--------------------------------------------------------------------------|------------------------------------------------------------------------------------------|-------------------------------|----------------|--------|----|
| 454                      | low coverage  | chr7:150286181-150286184 | ≤2reads in ≥2 samples                                                    | GAGC                                                                                     |                               | 25             | 4      |    |
|                          | no coverage   | chr7:150298287-150298345 | no coverage in NA17773                                                   | CACACACCCCCAAGCTGGCCCTTCTGCTGCCCATGGCCCCCTCCCCAGAGCCCAAGG                                |                               | 29             | 59     |    |
| Illumina GA              | low coverage  | chr3:38588463-38588538   | ≤9 reads in ≥2 samples                                                   | TAATATATAAATATGCACT<br>TATATAGGTGCATATTATA<br>TATTATAATATATACTTAT<br>ATTTATATATAGGTTTATA | LINE                          | 87             | 76     |    |
|                          |               | chr21:34764577-34764636  |                                                                          | GTAATAAATAAATAACTGAACTGATAAA<br>CAATATTAATAATTTAATAGCCATTAAAT<br>T                       |                               | 85             | 60     |    |
|                          |               | chr7:150286423-150286446 |                                                                          | CGGGGCGCCCCGCGCCGC<br>CCGCGCC                                                            | Low complexity                | 0              | 24     |    |
|                          |               | chr3:38588597-38588620   |                                                                          | TAAAGATATATTCATATGT<br>GAATA                                                             | LINE                          | 83             | 24     |    |
|                          |               | chr21:34769880-34769903  |                                                                          | TGAAAAAATTTATAAATT<br>ATACT                                                              | LINE                          | 92             | 24     |    |
|                          |               | chr3:38588657-38588673   |                                                                          | AATATATTTTTATATT                                                                         | LINE                          | 100            | 17     |    |
|                          |               | chr3:38585279-38585295   |                                                                          | TATCATTTTATATGATT                                                                        | LINE                          | 88             | 17     |    |
|                          |               | chr21:34752251-34752258  |                                                                          | TTTATATT                                                                                 | Low complexity, Simple repeat | 100            | 8      |    |
|                          |               | chr7:150286125-150286130 |                                                                          | TGGCCT                                                                                   |                               | 33             | 6      |    |
|                          |               | chr3:38589382-38589385   |                                                                          | TATA                                                                                     | Simple repeat                 | 100            | 4      |    |
|                          |               | chr3:38589328-38589331   |                                                                          | ATAT                                                                                     | Simple repeat                 | 100            | 4      |    |
|                          |               | chr11:73842475-73842478  |                                                                          | TATA                                                                                     | Simple repeat                 | 100            | 4      |    |
|                          |               | chr11:73839652-73839655  |                                                                          | TAAT                                                                                     | Low complexity                | 100            | 4      |    |
|                          | no coverage   | chr3:38588492-38588494   | no coverage in NA17773                                                   | CAT                                                                                      | LINE                          | 66             | 3      |    |
|                          |               | chr21:34764600-34764601  |                                                                          | GA                                                                                       | Low Complexity                | 50             | 2      |    |
|                          | SOLiD         | no coverage              | chr11:73839650-73839651                                                  | no coverage in NA17156                                                                   | AT                            | Low Complexity | 100    | 2  |
|                          |               |                          | chr11:73842034-73842037                                                  |                                                                                          | TGTT                          | SINE           | 75     | 4  |
|                          |               |                          | chr11:73843420-73843423                                                  |                                                                                          | TGTT                          |                | 75     | 4  |
| chr11:73857248-73857256  |               |                          | ATACAAGGT                                                                |                                                                                          |                               | 67             | 9      |    |
| chr2:223621493-223621497 |               |                          | AAAAA                                                                    |                                                                                          |                               | 100            | 5      |    |
| chr3:38588555-38588614   |               |                          | TATAAATACATATATGTAT<br>AATTATATAAATATATATTT<br>TTATAAAGATATATTCATA<br>TG |                                                                                          | LINE                          | 92             | 60     |    |
| chr3:38589340-38589342   |               |                          | TAT                                                                      |                                                                                          | Simple Repeat                 | 100            | 3      |    |
| chr21:34769887           |               |                          | A                                                                        |                                                                                          | LINE                          | 100            | 1      |    |
| chr11:73839650-73839659  |               |                          | no coverage in NA17275                                                   |                                                                                          | ATTAATTAAT                    | Low Complexity | 100    | 10 |
| chr11:73842034-          |               |                          |                                                                          | TGTT                                                                                     | SINE                          | 75             | 4      |    |

|                          |                           |                                                                   |                |                |     |    |
|--------------------------|---------------------------|-------------------------------------------------------------------|----------------|----------------|-----|----|
| 73842037                 |                           |                                                                   |                |                |     |    |
| chr11:73843420-73843423  |                           | TGTT                                                              | 75             | 4              |     |    |
| chr2:223621489-223621498 |                           | TTAAAAAAAA                                                        | 100            | 10             |     |    |
| chr3:38561031-38561035   |                           | AAAAA                                                             | Low Complexity | 100            | 5   |    |
| chr3:38586364-38586366   |                           | TTC                                                               | LINE           | 67             | 3   |    |
| chr3:38588485-38588519   |                           | ATAGGTGCATATTATATATATAAATATACTTAT                                 | LINE           | 86             | 35  |    |
| chr3:38588554-38588619   |                           | ATATAAATACATATATGTATAATTATATAAATATATATTTTATAAAGATATATTCATATGTGAAT | LINE           | 91             | 66  |    |
| chr3:38588657-38588668   |                           | AATATATTTTTT                                                      | LINE           | 100            | 12  |    |
| chr3:38589933-38589934   |                           | AA                                                                | LINE           | 100            | 2   |    |
| chr21:34661459           |                           | T                                                                 | Low Complexity | 100            | 1   |    |
| chr3:38589383            |                           | A                                                                 | Low Complexity | 100            | 1   |    |
| chr11:73839653-73839654  | no coverage in NA17460    | AA                                                                | Low Complexity | 100            | 2   |    |
| chr11:73842034-73842037  |                           | TGTT                                                              | SINE           | 75             | 4   |    |
| chr11:73843419-73843423  |                           | TTGTT                                                             |                | 80             | 5   |    |
| chr11:73844859-73844865  |                           | ATATATA                                                           | Simple Repeat  | 100            | 7   |    |
| chr11:73857248-73857256  |                           | ATACAAGGT                                                         |                | 67             | 9   |    |
| chr2:223621491-223621492 |                           | AA                                                                |                | 100            | 2   |    |
| chr3:38588493-38588511   |                           | ATATTATATATTATAATAT                                               | LINE           | 100            | 19  |    |
| chr3:38588552-38588613   |                           | TTATATAAATACATATATGTATAATTATATAAATATATATTTTTATAAAGATATATTCATAT    | LINE           | 94             | 62  |    |
| chr3:38588656-38588671   |                           | AAATATATTTTTTATA                                                  | LINE           | 100            | 16  |    |
| chr3:38589334-38589342   |                           | TTTATATAT                                                         | Simple Repeat  | 100            | 9   |    |
| chr3:38589382-38589384   |                           | TAT                                                               | Simple Repeat  | 100            | 3   |    |
| chr11:73839649-73839658  |                           | no coverage in NA17773                                            | AATTAATTAA     | Low Complexity | 100 | 10 |
| chr11:73842034-73842037  |                           |                                                                   | TGTT           | SINE           | 75  | 4  |
| chr11:73843420-73843424  |                           |                                                                   | TGTTA          |                | 80  | 5  |
| chr11:73857247-73857255  |                           |                                                                   | TATACAAGG      |                | 67  | 9  |
| chr3:38588493-38588496   |                           |                                                                   | ATAT           | LINE           | 100 | 4  |
| chr3:38588552-38588576   | TTATATAAATACATATATGTATAAT |                                                                   | LINE           | 92             | 25  |    |
| chr3:38588611-38588619   | TATGTGAAT                 |                                                                   | LINE           | 78             | 9   |    |
| chr3:38588661-38588678   | TATTTTTTATATTTATAT        |                                                                   | LINE           | 100            | 18  |    |
| chr21:34779357           | A                         |                                                                   | LINE           | 100            | 1   |    |

|                          |                                                  |                          |                                                                                                                                                                                                                                                                                                                                                       |                        |    |     |
|--------------------------|--------------------------------------------------|--------------------------|-------------------------------------------------------------------------------------------------------------------------------------------------------------------------------------------------------------------------------------------------------------------------------------------------------------------------------------------------------|------------------------|----|-----|
| low coverage             | chr3:38588449-38588731                           | ≤42 reads in ≥ 2 samples | ATTTATACATATAATAATA<br>TATAAATATGCACTTATAT<br>AGGTGCATATTATATATTA<br>TAATATATACTTATATTTAT<br>ATATAGGTTTATATAAATTG<br>TATATAATTATATAAATAC<br>ATATATGTATAAATTATATA<br>AATATATATTTTTATAAAG<br>ATATATTCATATGTGAATA<br>TATTTATATGGATTATATT<br>TATATATTTAATATACAAA<br>TATATTTTTTATATTTATAT<br>ATTTAATATACAAATACAT<br>TTTATATATTTATATATTTG<br>TACATATATATTTA | LINE                   | 91 | 283 |
|                          | chr3:38589292-38589397                           |                          | TATAATATATACACATGTA<br>ATATATAATATACACACAT<br>ATATTTTATATATATATATA<br>TATTTGTGTGTGTGTGTG<br>TATATATATACATATATAT<br>ATATATATATT                                                                                                                                                                                                                        | SINE,<br>Simple repeat | 87 | 106 |
|                          | chr21:34766415-34766484                          |                          | TCCAAAACTGATTTTAAA<br>AATGAAGCCATGGGTGAA<br>AGAAGTATTTAAAACCTCA<br>AGAAAAATTACTTT                                                                                                                                                                                                                                                                     | LINE                   | 74 | 70  |
|                          | chr21:34764611-34764675                          |                          | TTAATAATTTAATAGCCA<br>TTAAATTAACAAAATAATA<br>ATAATTAGATTTGGAATTT<br>TTTAAAGA                                                                                                                                                                                                                                                                          | Low complexity         | 88 | 65  |
|                          | chr3:38609333-38609390                           |                          | CTTCCAATCCAAGATC<br>TTAAAGCTTTTTTGCTTGT<br>TTTTATTCTAAAACTTTA<br>AA                                                                                                                                                                                                                                                                                   | LINE                   | 72 | 58  |
|                          | chr21:34763834-34763891                          |                          | TATATATACATAAAATAGG<br>AATACAAAACATGCTATTC<br>CTATTATATGTGTAATAGG<br>A                                                                                                                                                                                                                                                                                | LINE                   | 78 | 58  |
|                          | chr3:38585386-38585442                           |                          | TCTTAAAACAATTTTTGTG<br>GTTTCATTGTTTTACATTA<br>CAATTTTAAAAATTAATA                                                                                                                                                                                                                                                                                      | LINE                   | 84 | 57  |
|                          | chr21:34665968-34666016                          |                          | ATCTTAAAAAGTTCTCATTATTTAAGAAAA<br>AAAAATAAAAAGTTATAAT                                                                                                                                                                                                                                                                                                 |                        | 88 | 49  |
|                          | chr3:38588773-38588820                           |                          | TATATCTTTTATAGATTTT<br>ATATATTATATTTATGTGT<br>ATGAATATA                                                                                                                                                                                                                                                                                               | LINE                   | 90 | 48  |
|                          | chr21:34740239-34740285                          |                          | CATTCCCTGCTCCGTCGGACGGTGCC<br>CACATTCCCTGCTCCGTCGG                                                                                                                                                                                                                                                                                                    |                        | 32 | 47  |
|                          | chr21:34769787-34769832                          |                          | ATTTTCAGATTTCCAGAAA<br>AAAAAAGCAGAAAATCA<br>ATGTAACCT                                                                                                                                                                                                                                                                                                 | LINE                   | 74 | 46  |
|                          | chr3:38584380-38584425                           |                          | GGAGTTGTTCAAGATAAA<br>AAAAAAGTAGGTGATTG<br>TATTTTTTTC                                                                                                                                                                                                                                                                                                 | LINE                   | 74 | 46  |
|                          | chr2:223621480-223621521                         |                          | ACATTTTTTTTTAAAAAAGTTTTATGAA<br>GACTCAAAAGAA                                                                                                                                                                                                                                                                                                          |                        | 83 | 42  |
| chr3:38588835-38588875   | ACACACACATACACACAC<br>ATTTTTTTTTCTTTTTTGA<br>GAC | SINE                     | 71                                                                                                                                                                                                                                                                                                                                                    | 41                     |    |     |
| chr7:150286114-150286152 | CCCGGCGCGCATGGCCTCGATGTCGTC<br>GGCCGACGAGGC      |                          | 23                                                                                                                                                                                                                                                                                                                                                    | 39                     |    |     |
| chr21:34768590-34768628  | AATTAATAAAATTTCTTG<br>GAACTAATAAGTGATTTTA<br>T   | LINE                     | 82                                                                                                                                                                                                                                                                                                                                                    | 39                     |    |     |
| chr21:34769868-34769906  | AAGCATGATTCATGAAAA<br>AAATTTATAAATTATACTT        | LINE                     | 82                                                                                                                                                                                                                                                                                                                                                    | 39                     |    |     |



|  |                          |  |                                                 |                |     |    |
|--|--------------------------|--|-------------------------------------------------|----------------|-----|----|
|  |                          |  | GA                                              |                |     |    |
|  | chr3:38563947-38563985   |  | ATTCTGAAAATTTATGAAA<br>AAAATTAAGAAAAAATTCT<br>G | LINE           | 85  | 39 |
|  | chr3:38585314-38585351   |  | TTCATTTAGTAAAATTTTT<br>GATGTTACATTAAGAAAG<br>C  | LINE           | 79  | 38 |
|  | chr3:38586345-38586382   |  | TAAATTAAGAAATATATT<br>TTCTTTCTTTTTTTTTTTT       | LINE           | 92  | 38 |
|  | chr21:34792028-34792064  |  | TGTTCATTTTTAAATTCT<br>TTTTTTTTCTTTTTTTTG        | LINE           | 86  | 37 |
|  | chr11:73857232-73857265  |  | GTATATTGTATACAATATACAAGGTGGGT<br>ATATT          |                | 74  | 34 |
|  | chr3:38586704-38586737   |  | AGCACTATTTAGTTTTTAA<br>AAAAATAATTTCTAG          | SINE           | 82  | 34 |
|  | chr7:150288290-150288323 |  | AATAATTTTTCTTTTTTAAA<br>ATTTTTTAACTTTT          | SINE           | 94  | 34 |
|  | chr3:38610256-38610288   |  | ATAATTTTTTCATATGAAA<br>TTTGCATATCTTTT           | LINE           | 85  | 33 |
|  | chr21:34771485-34771517  |  | CTTAATGAATGCAAATTTT<br>GAAAAATTATTTAA           | LINE           | 85  | 33 |
|  | chr3:38589915-38589946   |  | GTTTTTCTTTTTTAAAAA<br>AAATTTCCCTC               | LINE           | 81  | 32 |
|  | chr11:73839639-73839669  |  | TATTTAATTAATTAATTA<br>TTTATTTTTTG               | Low complexity | 97  | 31 |
|  | chr11:73842457-73842487  |  | TATATAGATATATAGATAT<br>ATAGATATAGAT             | Simple repeat  | 87  | 31 |
|  | chr3:38589536-38589565   |  | ATGCCAGCTAATTTTTAA<br>AAATCTTTTTG               | SINE           | 73  | 30 |
|  | chr11:73850460-73850488  |  | TATGTACACATAGGTTTAAAAA                          |                | 83  | 29 |
|  | chr21:34760240-34760267  |  | AAAAAAAATGCTTAAGTA<br>TAAAATATT                 |                | 89  | 28 |
|  | chr21:34766085-34766112  |  | TATATTTTTCTAGAAAA<br>AAAACATGA                  |                | 86  | 28 |
|  | chr21:34800133-34800160  |  | TTTAACTACAGTATTTTTA<br>AAATAGAAC                |                | 82  | 28 |
|  | chr21:34767518-34767545  |  | AAGAAATAAGAAAAATTA<br>TTAAAAATA                 | LINE           | 93  | 28 |
|  | chr21:34773303-34773330  |  | TAAAATCTATTTAAAAAA<br>TTAAATAA                  | LINE           | 96  | 28 |
|  | chr11:73843778-73843803  |  | TTTATTTTTATTTTTCAAA<br>ATAGAA                   |                | 92  | 26 |
|  | chr3:38561022-38561047   |  | CTTTTTAAAAAAAAAAAAA<br>CAAAAAA                  | Low complexity | 92  | 26 |
|  | chr21:34765892-34765916  |  | AAATGAATTTTTGAAAAGA<br>AAAATG                   | LINE           | 84  | 25 |
|  | chr21:34765980-34766004  |  | CAAAATTTTAAAAACAAA<br>ATTAGC                    | LINE           | 84  | 25 |
|  | chr21:34767323-34767347  |  | AAATATTTTGAACAAATG<br>AAAATA                    | LINE           | 88  | 25 |
|  | chr11:73844845-73844868  |  | TTAAATATATATATATAT<br>ATAT                      | Simple repeat  | 100 | 24 |
|  | chr11:73847952-73847975  |  | ATTTTTTTTTTTTTTTTTT<br>TGAG                     | SINE           | 92  | 24 |
|  | chr11:73861890-73861913  |  | TGTCTCAGGGGAAAAAAA<br>AAAAAA                    | SINE           | 71  | 24 |
|  | chr21:34779348-34779371  |  | AAAAATTAATTTATTTTT<br>AAAAA                     | LINE           | 100 | 24 |
|  | chr21:34661145-34661167  |  | AAAAAAAAAAAAAAAAAAAA<br>AAAAA                   | SINE           | 100 | 23 |
|  | chr21:34773600-34773622  |  | AATAAGTATTAATTTATGA<br>AAAT                     | LINE           | 91  | 23 |
|  | chr21:34794863-          |  | CATATATAATCTTATTTTT                             | LINE           | 87  | 23 |

|                          |                             |                         |     |    |
|--------------------------|-----------------------------|-------------------------|-----|----|
| 34794885                 | CAAA                        |                         |     |    |
| chr2:223618795-223618817 | TTATTTTTTATTTTTTATTT<br>TTT | SINE                    | 100 | 23 |
| chr3:38656858-38656879   | AGTTTAAAAAATGTGGCT<br>GTTA  |                         | 73  | 22 |
| chr11:73840545-73840566  | TTTTTTTTTTTTTTTTTTTT<br>TA  | SINE                    | 100 | 22 |
| chr21:34752232-34752253  | TTAAATTTTATATTATTTAT<br>TT  | Simple<br>repeat        | 100 | 22 |
| chr21:34785307-34785328  | AAAAAAAAAAAAAAAAAAAA<br>AAA | SINE                    | 100 | 22 |
| chr11:73844432-73844452  | TTTTTTTGAGACAGAGCC<br>TTG   | SINE                    | 62  | 21 |
| chr21:34749348-34749368  | CTTAAAAAAAAAAAAAAAAAG<br>AA | LINE                    | 90  | 21 |
| chr21:34754893-34754913  | TTTTTTCTTTTTTTCTGA<br>G     | SINE                    | 81  | 21 |
| chr21:34775648-34775668  | CAAAAAAAAAAAAAAAAAAA<br>AA  | SINE                    | 95  | 21 |
| chr21:34781297-34781317  | ATGTTGGTGTGCTGCACC<br>CAT   | LINE                    | 48  | 21 |
| chr3:38651571-38651591   | TATTTTAAAAATTAAAAAA<br>AA   | Low<br>complexity       | 100 | 21 |
| chr21:34661327-34661346  | TCAAAAAAAAAAAAAAAAAA<br>A   |                         | 95  | 20 |
| chr21:34764325-34764344  | TTCAAGTTGAATTTTTTAT<br>A    |                         | 85  | 20 |
| chr11:73839006-73839025  | TAGAAAAAAAAAAAAAAAAA<br>A   | Simple<br>repeat        | 95  | 20 |
| chr11:73839795-73839814  | TTTTTTAAAAATTATTTT<br>TA    | SINE                    | 100 | 20 |
| chr11:73840384-73840403  | TTTTTTTTTTTTGAGACAG<br>A    | SINE                    | 80  | 20 |
| chr21:34764556-34764575  | ATAAAATAAAAATTTTGAA<br>A    | Low<br>complexity       | 95  | 20 |
| chr21:34752368-34752386  | AAAAAAATTTTGCCAGTC<br>A     |                         | 74  | 19 |
| chr21:34810583-34810601  | GGTTTAAAGCCTTTTAAA          |                         | 74  | 19 |
| chr3:38610336-38610354   | TGGAACCTTTAAAAATTTA         | LINE                    | 84  | 19 |
| chr21:34661453-34661471  | ACTTTTTTATTTTAAAAAA         | SINE, Low<br>complexity | 95  | 19 |
| chr21:34662769-34662787  | AAAAAACAAAAATTTTTT          | SINE                    | 95  | 19 |
| chr21:34774706-34774724  | TTTTTTTTTTTTTTTTGAG         | SINE                    | 89  | 19 |
| chr21:34781207-34781225  | TTTTTTTTTTAATATATAT         | LINE                    | 100 | 19 |
| chr21:34748682-34748699  | TTTTAAAGAATTTTTTTA          |                         | 94  | 18 |
| chr11:73842027-73842044  | ATAGGGTTGTTATGAGGG          | SINE                    | 56  | 18 |
| chr21:34740384-34740400  | CATTCCCTGCTCCGTCC           |                         | 35  | 17 |
| chr21:34758606-34758622  | AAGATTTAAAAATTGAG           |                         | 82  | 17 |
| chr21:34668223-34668239  | AAAAAAAAAAAAAAAAAAAA        | SINE                    | 100 | 17 |
| chr21:34787644-34787660  | TTTTTTTATTTTTTAAT           | LINE                    | 100 | 17 |
| chr3:38587375-38587391   | TGAATTAATAATTTAT            | LINE                    | 94  | 17 |
| chr3:38608142-           | CAAAAAAAAAAAAAATAG          | SINE                    | 88  | 17 |

|                          |
|--------------------------|
| 38608158                 |
| chr21:34738730-34738745  |
| chr21:34789673-34789688  |
| chr21:34802359-34802374  |
| chr3:38601417-38601432   |
| chr11:73843414-73843428  |
| chr21:34810697-34810711  |
| chr7:150283890-150283904 |
| chr11:73841785-73841799  |
| chr3:38575905-38575919   |
| chr3:38613625-38613639   |
| chr7:150286427-150286441 |
| chr21:34778470-34778483  |
| chr11:73859080-73859093  |
| chr21:34768247-34768260  |
| chr21:34770609-34770622  |
| chr21:34776430-34776443  |
| chr21:34779857-34779870  |
| chr21:34803622-34803635  |
| chr21:34813572-34813585  |
| chr3:38636242-38636255   |
| chr2:223625535-223625547 |
| chr11:73845021-73845033  |
| chr21:34771402-34771414  |
| chr21:34790243-34790255  |
| chr7:150295303-150295315 |
| chr21:34669909-34669920  |
| chr21:34816357-34816368  |
| chr11:73844590-73844601  |
| chr3:38619706-38619717   |
| chr7:150277436-150277447 |
| chr3:38609269-38609279   |
| chr21:34788495-          |

|                      |                |     |    |
|----------------------|----------------|-----|----|
| AAAAAAAAAAAAAAAAAAAA | SINE           | 100 | 16 |
| CTGGACTTTTTTTTTTTT   | LINE           | 75  | 16 |
| TTTTTTTTTTTTTTTTTT   | SINE           | 100 | 16 |
| TCTCAAAAAAAAAAAAAA   | SINE           | 88  | 16 |
| TAGGGTTGTTATGAG      |                | 60  | 15 |
| TAAAAAAAAATATTTT     |                | 100 | 15 |
| AGGCTCCCCCGCCCC      |                | 13  | 15 |
| TCAAAAAAAAAAAAAAT    | SINE           | 93  | 15 |
| TTTTTTTTTTTTTTTTTT   | SINE           | 100 | 15 |
| CAACAAATATTTATT      | SINE           | 87  | 15 |
| GCGCCCGCGCCGCC       | Low complexity | 0   | 15 |
| GGAAAAAAAAAAAAAA     |                | 86  | 14 |
| AAAAAAAAAAAAATTA     | SINE           | 100 | 14 |
| AAAATCATATGAT        | LINE           | 86  | 14 |
| AAAATCTGCATGTA       | LINE           | 71  | 14 |
| AAAAAAAAAAAAAAAAAA   | SINE           | 100 | 14 |
| AAAAAAAAAAAAAAAAAA   | SINE           | 100 | 14 |
| TTAACTTTTTTTTTTT     | SINE           | 93  | 14 |
| TTTTTTTTTTTTTTTTTT   | SINE           | 100 | 14 |
| TTTTTCTTTTTTCT       | SINE           | 86  | 14 |
| AAAAAAAAAAAAAAAAAA   |                | 100 | 13 |
| TCAAAAAAAAAAAAAA     | SINE           | 92  | 13 |
| ATGTAATTTTA          | LINE           | 92  | 13 |
| ACTTTTTTTTTTTC       | SINE, LINE     | 85  | 13 |
| AAATTAATTAATT        | SINE           | 100 | 13 |
| CTGCGGGGCGCC         |                | 8   | 12 |
| AAAAAAAAAAAAAA       |                | 100 | 12 |
| TTTGTATTTTTT         | SINE           | 92  | 12 |
| TTTTTTTTTTTTTT       | SINE           | 100 | 12 |
| TTTTTTTTTTTTTT       | Simple repeat  | 100 | 12 |
| TTTAACAATTT          | LINE           | 91  | 11 |
| AGGATTTTTTTT         | LINE           | 82  | 11 |

|                          |              |                |     |    |
|--------------------------|--------------|----------------|-----|----|
| 34788505                 |              |                |     |    |
| chr2:223618906-223618916 | CATTCTCCTGC  | SINE           | 45  | 11 |
| chr3:38590562-38590572   | TTTTTTTTTTTT | SINE           | 100 | 11 |
| chr3:38610782-38610792   | TTTTTTTTTTGA | SINE           | 91  | 11 |
| chr3:38613419-38613428   | GAAAAAAAAA   |                | 90  | 10 |
| chr21:34664204-34664213  | TTTAAAAAAC   | LINE           | 90  | 10 |
| chr21:34783162-34783171  | AAAAAAAAAA   | SINE           | 100 | 10 |
| chr11:73850436-73850444  | TTTTTTTTTA   |                | 100 | 9  |
| chr21:34741859-34741867  | GGGGCAGCC    |                | 11  | 9  |
| chr11:73859245-73859253  | AAAAAAAAAA   | SINE           | 100 | 9  |
| chr21:34738236-34738244  | TAAAAATTA    | SINE           | 100 | 9  |
| chr21:34771136-34771144  | ACCAACATG    | LINE           | 56  | 9  |
| chr21:34740875-34740882  | AATTTTTT     |                | 100 | 8  |
| chr21:34750880-34750887  | TTTGAAA      |                | 75  | 8  |
| chr3:38579741-38579748   | CAGGCCAA     |                | 38  | 8  |
| chr3:38616065-38616072   | TTTTAAAT     | LINE           | 100 | 8  |
| chr11:73858951-73858958  | AAAAAAAA     | SINE           | 100 | 8  |
| chr21:34658942-34658949  | AAAAAAAA     | SINE           | 100 | 8  |
| chr21:34764767-34764774  | GAAATTTT     | LINE           | 88  | 8  |
| chr3:38589750-38589757   | TTTTTTTG     | LINE           | 88  | 8  |
| chr3:38644238-38644245   | AAAAAAAA     | SINE           | 100 | 8  |
| chr21:34789626-34789632  | CAATTCT      | LINE           | 71  | 7  |
| chr3:38556661-38556667   | TTTTTTT      | SINE           | 100 | 7  |
| chr3:38563736-38563742   | AAATAAA      | LINE           | 100 | 7  |
| chr3:38588256-38588262   | TTATATA      | Low complexity | 100 | 7  |
| chr7:150289324-150289330 | TTTTTTT      | SINE           | 100 | 7  |
| chr21:34799621-34799626  | TTTTTG       |                | 83  | 6  |
| chr21:34774288-34774293  | AAAAAA       | SINE           | 100 | 6  |
| chr21:34665956-34665960  | TGCAG        |                | 40  | 5  |
| chr2:223618295-223618299 | TTTAA        |                | 100 | 5  |
| chr7:150282296-150282300 | AAAAA        |                | 100 | 5  |
| chr21:34764804-34764808  | TAAAA        | LINE           | 100 | 5  |
| chr21:34817959-          | TTTTT        | SINE           | 100 | 5  |

|                          |  |       |                |     |   |
|--------------------------|--|-------|----------------|-----|---|
| 34817963                 |  |       |                |     |   |
| chr7:150291368-150291372 |  | CCAGA | SINE           | 40  | 5 |
| chr21:34743183-34743186  |  | TGCT  |                | 50  | 4 |
| chr21:34660979-34660982  |  | TGTA  | SINE           | 75  | 4 |
| chr21:34739279-34739282  |  | TCTA  | SINE           | 75  | 4 |
| chr21:34764859-34764862  |  | AACA  | LINE           | 75  | 4 |
| chr2:223622088-223622091 |  | TAAA  | LINE           | 100 | 4 |
| chr21:34815282-34815284  |  | TTA   |                | 100 | 3 |
| chr21:34767716-34767718  |  | TTA   | LINE           | 100 | 3 |
| chr21:34794247-34794249  |  | TAA   | Low complexity | 100 | 3 |
| chr7:150275826-150275828 |  | CCG   | Low complexity | 0   | 3 |
| chr21:34748441-34748442  |  | AA    |                | 100 | 2 |
| chr21:34815564-34815565  |  | AT    |                | 100 | 2 |
| chr7:150294314-150294315 |  | AA    |                | 100 | 2 |
| chr21:34764814-34764815  |  | TA    | LINE           | 100 | 2 |
| chr21:34814581           |  | A     |                | 100 | 1 |
| chr2:223625484           |  | T     |                | 100 | 1 |
| chr3:38606725            |  | A     |                | 100 | 1 |
| chr11:73847538           |  | A     | SINE           | 100 | 1 |
| chr21:34662447           |  | T     | Simple repeat  | 100 | 1 |
| chr21:34746912           |  | T     | SINE           | 100 | 1 |
| chr21:34766497           |  | A     | LINE           | 100 | 1 |
| chr21:34802205           |  | T     | SINE           | 100 | 1 |
| chr2:223622081           |  | T     | LINE           | 100 | 1 |
| chr3:38587759            |  | T     | SINE           | 100 | 1 |

**Supplemental Table 7. Analysis of 23 LR-PCR amplicons for imbalanced allelic amplification.** The distribution of the alternate allele read frequency at positions known to be heterozygous based on ABI Sanger data is shown with the data from all three technologies combined. Amplicons that do not follow the expected AARF distribution from Supplemental Figure 1 (with  $p < 0.01$ ) are highlighted in grey and were removed from subsequent analysis.

| Amplicon name      | Amplicon coordinate      | Sample  | p-value          | # of Sanger Het positions by 3 NGS | Distribution of AARF |       |       |       |       |       |        |
|--------------------|--------------------------|---------|------------------|------------------------------------|----------------------|-------|-------|-------|-------|-------|--------|
|                    |                          |         |                  |                                    | 0-10                 | 10-20 | 20-40 | 40-60 | 60-80 | 80-90 | 90-100 |
| LPCR_382423_11004  | chr2:223616214-223627218 | NA17156 |                  | 3*2                                | 0                    | 0     | 1     | 3     | 2     | 0     | 0      |
|                    |                          | NA17460 |                  | 3*6                                | 0                    | 1     | 5     | 10    | 2     | 0     | 0      |
|                    |                          | NA17275 |                  | 3*8                                | 3                    | 1     | 7     | 12    | 1     | 0     | 0      |
|                    |                          | NA17773 |                  | 3*3                                | 0                    | 0     | 4     | 5     | 0     | 0     | 0      |
| LPCR_721496_11101  | chr3:38553978-38565079   | NA17773 |                  | 3*1                                | 0                    | 0     | 1     | 2     | 0     | 0     | 0      |
| LPCR_721498_8720   | chr3:38575485-38584205   | NA17156 |                  | 3*1                                | 0                    | 0     | 2     | 1     | 0     | 0     | 0      |
| LPCR_721500-_11083 | chr3:38595323-38606406   | NA17275 | 10 <sup>-7</sup> | 3*2                                | 6                    | 0     | 0     | 0     | 0     | 0     | 0      |
|                    |                          | NA17773 |                  | 3*1                                | 0                    | 0     | 0     | 3     | 0     | 0     | 0      |
| LPCR_721501_11969  | chr3:38606353-38618322   | NA17275 |                  | 3*1                                | 0                    | 0     | 0     | 3     | 0     | 0     | 0      |
| LPCR_721502_11967  | chr3:38618395-38630362   | NA17156 |                  | 3*11                               | 0                    | 0     | 9     | 22    | 2     | 0     | 0      |
|                    |                          | NA17460 |                  | 3*3                                | 0                    | 0     | 3     | 6     | 0     | 0     | 0      |
|                    |                          | NA17275 |                  | 3*12                               | 1                    | 1     | 2     | 31    | 1     | 0     | 0      |
|                    |                          | NA17773 |                  | 3*14                               | 2                    | 1     | 10    | 27    | 2     | 0     | 0      |
| LPCR_721503_11821  | chr3:38630330-38642151   | NA17156 |                  | 3*1                                | 1                    | 0     | 1     | 1     | 0     | 0     | 0      |
|                    |                          | NA17460 |                  | 3*4                                | 0                    | 0     | 1     | 9     | 2     | 0     | 0      |
|                    |                          | NA17275 |                  | 3*4                                | 1                    | 0     | 3     | 7     | 1     | 0     | 0      |
|                    |                          | NA17773 |                  | 3*1                                | 0                    | 0     | 0     | 3     | 0     | 0     | 0      |
| LPCR_721504_11891  | chr3:38642100-38653991   | NA17156 |                  | 3*3                                | 0                    | 0     | 2     | 7     | 0     | 0     | 0      |
|                    |                          | NA17460 |                  | 3*7                                | 0                    | 0     | 7     | 13    | 1     | 0     | 0      |
|                    |                          | NA17275 |                  | 3*3                                | 0                    | 0     | 6     | 3     | 0     | 0     | 0      |
|                    |                          | NA17773 |                  | 3*2                                | 0                    | 0     | 2     | 1     | 3     | 0     | 0      |
| LPCR_721505_11811  | chr3:38653478-38665289   | NA17156 |                  | 3*3                                | 0                    | 0     | 4     | 2     | 3     | 0     | 0      |
|                    |                          | NA17460 |                  | 3*4                                | 0                    | 0     | 5     | 7     | 0     | 0     | 0      |
|                    |                          | NA17275 |                  | 3*5                                | 0                    | 0     | 5     | 10    | 0     | 0     | 0      |
|                    |                          | NA17773 |                  | 3*7                                | 0                    | 0     | 6     | 13    | 2     | 0     | 0      |
| LPCR_54275_11143   | chr7:150269610-150280753 | NA17156 | 0.0001           | 3*1                                | 3                    | 0     | 0     | 0     | 0     | 0     | 0      |
|                    |                          | NA17460 |                  | 3*6                                | 5                    | 1     | 3     | 8     | 1     | 0     | 0      |
|                    |                          | NA17773 |                  | 3*8                                | 3                    | 0     | 7     | 12    | 1     | 1     | 0      |
| LPCR_54276_4905    | chr7:150280713-150285618 | NA17156 |                  | 3*3                                | 0                    | 0     | 3     | 4     | 2     | 0     | 0      |
|                    |                          | NA17275 |                  | 3*2                                | 0                    | 0     | 1     | 5     | 0     | 0     | 0      |
|                    |                          | NA17773 |                  | 3*2                                | 0                    | 0     | 0     | 4     | 2     | 0     | 0      |
| LPCR_1527027_3087  | chr7:150284619-150287706 | NA17156 |                  | 3*3                                | 0                    | 0     | 2     | 7     | 0     | 0     | 0      |
|                    |                          | NA17460 |                  | 3*3                                | 0                    | 0     | 3     | 5     | 1     | 0     | 0      |
|                    |                          | NA17275 |                  | 3*1                                | 0                    | 0     | 0     | 2     | 0     | 1     | 0      |
|                    |                          | NA17773 |                  | 3*3                                | 0                    | 0     | 3     | 5     | 1     | 0     | 0      |
| LPCR_54277_11487   | chr7:150286689-150298176 | NA17156 |                  | 3*1                                | 0                    | 0     | 1     | 2     | 0     | 0     | 0      |
|                    |                          | NA17460 |                  | 3*3                                | 0                    | 0     | 3     | 5     | 1     | 0     | 0      |

|                   |                          |         |                     |      |    |   |   |    |    |    |    |
|-------------------|--------------------------|---------|---------------------|------|----|---|---|----|----|----|----|
|                   |                          | NA17275 |                     | 3*2  | 0  | 0 | 1 | 5  | 0  | 0  | 0  |
|                   |                          | NA17773 |                     | 3*2  | 0  | 0 | 1 | 5  | 0  | 0  | 0  |
| LPCR_54278_3423   | chr7:150298170-150301593 | NA17156 |                     | 3*2  | 0  | 0 | 1 | 5  | 0  | 0  | 0  |
|                   |                          | NA17460 |                     | 3*2  | 0  | 0 | 4 | 1  | 1  | 0  | 0  |
|                   |                          | NA17275 |                     | 3*2  | 1  | 0 | 2 | 3  | 0  | 0  | 0  |
|                   |                          | NA17773 |                     | 3*4  | 3  | 0 | 3 | 6  | 0  | 0  | 0  |
| LPCR_240580_9001  | chr11:73836950-73845951  | NA17156 | < 10 <sup>-16</sup> | 3*13 | 0  | 0 | 1 | 2  | 22 | 10 | 4  |
|                   |                          | NA17460 |                     | 3*9  | 2  | 1 | 5 | 10 | 9  | 0  | 0  |
|                   |                          | NA17275 |                     | 3*9  | 1  | 0 | 2 | 11 | 13 | 0  | 0  |
|                   |                          | NA17773 | 2*10 <sup>-9</sup>  | 3*10 | 0  | 0 | 1 | 4  | 21 | 4  | 0  |
| LPCR_240581_8458  | chr11:73845929-73854387  | NA17156 |                     | 3*2  | 0  | 0 | 0 | 6  | 0  | 0  | 0  |
|                   |                          | NA17460 |                     | 3*2  | 0  | 0 | 1 | 5  | 0  | 0  | 0  |
|                   |                          | NA17275 |                     | 3*3  | 0  | 0 | 2 | 5  | 2  | 0  | 0  |
|                   |                          | NA17773 |                     | 3*3  | 0  | 0 | 4 | 4  | 1  | 0  | 0  |
| LPCR_1977_14227   | chr21:34657259-34671486  | NA17460 | 0.0008              | 3*9  | 18 | 0 | 0 | 0  | 0  | 0  | 9  |
|                   |                          | NA17275 | 3*10 <sup>-7</sup>  | 3*8  | 6  | 0 | 0 | 0  | 1  | 6  | 11 |
|                   |                          | NA17773 | 0.002               | 3*9  | 16 | 1 | 1 | 0  | 0  | 0  | 9  |
| LPCR_1983_10796   | chr21:34735911-34746707  | NA17156 |                     | 3*7  | 0  | 0 | 4 | 15 | 2  | 0  | 0  |
|                   |                          | NA17460 |                     | 3*2  | 0  | 0 | 2 | 3  | 1  | 0  | 0  |
|                   |                          | NA17773 |                     | 3*4  | 1  | 1 | 3 | 7  | 0  | 0  | 0  |
| LPCR_778623_3341  | chr21:34746238-34749579  | NA17460 |                     | 3*1  | 0  | 0 | 1 | 1  | 1  | 0  | 0  |
|                   |                          | NA17773 |                     | 3*2  | 0  | 0 | 1 | 5  | 0  | 0  | 0  |
| LPCR_778624_11646 | chr21:34749486-34761132  | NA17156 |                     | 3*4  | 0  | 0 | 2 | 8  | 2  | 0  | 0  |
|                   |                          | NA17460 |                     | 3*1  | 0  | 0 | 1 | 2  | 0  | 0  | 0  |
|                   |                          | NA17773 |                     | 3*2  | 0  | 0 | 1 | 5  | 0  | 0  | 0  |
| LPCR_1988_4624    | chr21:34795398-34800022  | NA17156 |                     | 3*1  | 0  | 0 | 1 | 1  | 1  | 0  | 0  |
|                   |                          | NA17460 |                     | 3*1  | 0  | 0 | 1 | 2  | 0  | 0  | 0  |
| LPCR_1989_6410    | chr21:34799969-34806379  | NA17156 |                     | 3*2  | 0  | 0 | 2 | 3  | 1  | 0  | 0  |
|                   |                          | NA17460 |                     | 3*1  | 0  | 0 | 1 | 2  | 0  | 0  | 0  |
| LPCR_1990_12103   | chr21:34806347-34818450  | NA17156 |                     | 3*5  | 0  | 0 | 0 | 14 | 1  | 0  | 0  |
|                   |                          | NA17460 |                     | 3*2  | 1  | 0 | 1 | 4  | 0  | 0  | 0  |

**Supplemental Table 8.** Accuracy of NGS and Sanger technologies assessed by genotyping SNPs in the Illumina Human Hap550 BeadChip.

|             | NA17156         | NA17275         | NA17460         | NA17773         | All Individuals Combined |
|-------------|-----------------|-----------------|-----------------|-----------------|--------------------------|
| ABI Sanger  | 100%<br>(24/24) | 96%<br>(24/25)  | 96%<br>(23/24)  | 100%<br>(22/22) | 98%<br>(93/95)           |
| Roche 454   | 99%<br>(76/77)  | 97%<br>(75/77)  | 98%<br>(78/80)  | 96%<br>(76/79)  | 97.4%<br>(305/313)       |
| Illumina GA | 100%<br>(77/77) | 100%<br>(77/77) | 100%<br>(80/80) | 100%<br>(79/79) | 100%<br>(313/313)        |
| ABI SOLiD   | 100%<br>(77/77) | 100%<br>(77/77) | 100%<br>(80/80) | 99%<br>(78/79)  | 99.7%<br>(312/313)       |



**Supplemental Table 9.** Discordant genotypes (in bold) between SNPs from the Illumina HumanHap550 array and the sequencing technologies.

| Individual | Location       | dbSNP rs id | HumanHap550 Genotype | ABI Sanger Genotype | Roche 454 Genotype | Illumina GA Genotype | ABI SOLiD Genotype |
|------------|----------------|-------------|----------------------|---------------------|--------------------|----------------------|--------------------|
| NA17275    | chr11:73843968 | rs7789      | <b>GT</b>            | <b>TT</b>           | GT                 | GT                   | GT                 |
| NA17460    | chr11:73843968 | rs7789      | <b>GT</b>            | <b>TT</b>           | GT                 | GT                   | GT                 |
| NA17773    | chr11:73861481 | rs633335    | <b>CC</b>            | -                   | <b>CT</b>          | CC                   | CC                 |
| NA17275    | chr21:34743289 | rs2070357   | <b>CC</b>            | CC                  | <b>CT</b>          | CC                   | CC                 |
| NA17773    | chr21:34743289 | rs2070357   | <b>CT</b>            | CT                  | <b>TT</b>          | CT                   | CT                 |
| NA17773    | chr21:34761833 | rs11701051  | <b>CT</b>            | -                   | CT                 | CT                   | <b>TT</b>          |
| NA17460    | chr21:34806395 | rs11702354  | <b>AG</b>            | AG                  | <b>GG</b>          | AG                   | AG                 |
| NA17773    | chr21:34806395 | rs11702354  | <b>AA</b>            | AA                  | <b>GG</b>          | AA                   | AA                 |
| NA17275    | chr3:38606427  | rs7373157   | <b>GT</b>            | -                   | <b>GG</b>          | GT                   | GT                 |
| NA17156    | chr3:38630647  | rs9856587   | <b>CT</b>            | CT                  | <b>CC</b>          | CT                   | CT                 |
| NA17460    | chr3:38635940  | rs12498069  | <b>AC</b>            | -                   | <b>CC</b>          | AC                   | AC                 |

**Supplemental Table 10.** Comparison of ABI Sanger platform base calls at 258,879 bp (4 samples) sequenced by 3 NGS Technologies.

|             |     | Sanger  |     |     |     |
|-------------|-----|---------|-----|-----|-----|
|             |     | Ref     | Het | Alt | N/N |
| Roche 454   | Ref | 258,290 | 12  | 1   | 98  |
|             | Het | 16      | 203 | 6   | 14  |
|             | Alt | 1       | 1   | 104 | 2   |
|             | N/N | 131     | 0   | 0   | 0   |
| Illumina GA | Ref | 258,388 | 3   | 0   | 96  |
|             | Het | 28      | 217 | 0   | 15  |
|             | Alt | 3       | 0   | 111 | 3   |
|             | N/N | 15      | 0   | 0   | 0   |
| ABI SOLiD   | Ref | 257,919 | 6   | 0   | 92  |
|             | Het | 28      | 200 | 3   | 13  |
|             | Alt | 8       | 6   | 108 | 1   |
|             | N/N | 480     | 8   | 0   | 7   |

**Supplemental Table 11.** Quality metrics for the four DNA Samples in the three NGS technologies when compared to ABI Sanger data (Figure 4).

|             |         | Sequencing Accuracy | Variant Accuracy | Coverage Rate | False Positive Rate | False Negative Rate | Variant Discrepancy Rate |
|-------------|---------|---------------------|------------------|---------------|---------------------|---------------------|--------------------------|
| Roche 454   | ALL     | 0.99990             | 0.948            | 0.9996        | 0.025               | 0.031               | 0.022                    |
|             | NA17156 | 0.99990             | 0.956            | 0.9994        | 0.022               | 0.011               | 0.034                    |
|             | NA17275 | 0.99988             | 0.919            | 0.9999        | 0.033               | 0.048               | 0.034                    |
|             | NA17460 | 0.99990             | 0.946            | 1.0000        | 0.022               | 0.032               | 0.022                    |
|             | NA17773 | 0.99993             | 0.962            | 0.9990        | 0.026               | 0.038               | 0.000                    |
| Illumina GA | ALL     | 0.99991             | 1.000            | 1.0000        | 0.063               | 0.000               | 0.000                    |
|             | NA17156 | 0.99992             | 1.000            | 1.0000        | 0.053               | 0.000               | 0.000                    |
|             | NA17275 | 0.99990             | 1.000            | 1.0000        | 0.086               | 0.000               | 0.000                    |
|             | NA17460 | 0.99994             | 1.000            | 1.0000        | 0.041               | 0.000               | 0.000                    |
|             | NA17773 | 0.99990             | 1.000            | 0.9999        | 0.080               | 0.000               | 0.000                    |
| ABI SOLiD   | ALL     | 0.99985             | 0.963            | 0.9984        | 0.078               | 0.009               | 0.028                    |
|             | NA17156 | 0.99983             | 0.967            | 0.9979        | 0.072               | 0.000               | 0.033                    |
|             | NA17275 | 0.99990             | 0.984            | 0.9987        | 0.076               | 0.000               | 0.016                    |
|             | NA17460 | 0.99982             | 0.921            | 0.9984        | 0.065               | 0.034               | 0.047                    |
|             | NA17773 | 0.99985             | 0.988            | 0.9985        | 0.101               | 0.000               | 0.013                    |

**Supplemental Table 12. Discordant genotypes between NGS platforms and ABI Sanger**

| Found by               | NCBI36_sample    | Upstream Sequence            | Downstream Sequence            | Repeats                        | ABI Sanger genotype    | NGS genotypes |             |           | Category               |                             |
|------------------------|------------------|------------------------------|--------------------------------|--------------------------------|------------------------|---------------|-------------|-----------|------------------------|-----------------------------|
|                        |                  |                              |                                |                                |                        | Roche 454     | Illumina GA | ABI SOLiD |                        |                             |
| False Positive         | Roche 454 only   | chr21_34774913_NA17275       | GTTTTGCCTTGTTAGCCAAGCTGGTCTC   | AACTCCTGACCTCAGGTGATCCACCTGCTT | AluSx                  | GG            | AG          | GG        | GG                     | repetitive element & in/del |
|                        |                  | chr21_34774913_NA17773       | GTTTTGCCTTGTTAGCCAAGCTGGTCTC   | AACTCCTGACCTCAGGTGATCCACCTGCTT | AluSx                  | GG            | AG          | GG        | GG                     | repetitive element & in/del |
|                        |                  | chr2_223627087_NA17275       | GGTGGTTCAGGAGACTCTTCTGATCTT    | CTAGAAGGGGTAAAGTGGGGTGAACAAGG  |                        | TT            | CT          | TT        | TT                     |                             |
|                        |                  | chr3_38602150_NA17156        | ATTGGATGGGTGGGTAGCTGGGTAGATG   | GTGGATGGTGTGTGTGTGCCCTTGCCAA   | (TGGA) <sub>n</sub>    | AA            | AT          | AA        | AA                     | simple repeat & in/del      |
|                        |                  | chr3_38602150_NA17460        | ATTGGATGGGTGGGTAGCTGGGTAGATG   | GTGGATGGTGTGTGTGTGCCCTTGCCAA   | (TGGA) <sub>n</sub>    | AA            | AT          | AA        | AA                     | simple repeat & in/del      |
|                        |                  | chr3_38602150_NA17773        | ATTGGATGGGTGGGTAGCTGGGTAGATG   | GTGGATGGTGTGTGTGTGCCCTTGCCAA   | (TGGA) <sub>n</sub>    | AA            | AT          | AA        | AA                     | simple repeat & in/del      |
|                        | Illumina GA only | chr11_73842453_NA17275       | GATACAGAGATACAGAGATACAGAGATA   | AGATATATAGATATATAGATATATAGATAT | (CAGAG A) <sub>n</sub> | CC            | CC          | CT        | CC                     | simple repeat               |
|                        |                  | chr11_73845036_NA17275       | TAGGGAGACTGTCTCAAAAAAAAAAAAA   | AAAAGAAAAGAAAAGTTTCTCACATCA    | AluSx                  | GG            | GG          | AG        | GG                     | homopolymer                 |
|                        |                  | chr21_34749366_NA17156       | TTCCTTGGAACTTAAAAAAAAAAAAAAAA  | AAACAAAAACAACCAACCAAAAATATATCT | L1PA10                 | GG            | GG          | AG        | GG                     | homopolymer & in/del        |
|                        |                  | chr21_34749366_NA17275       | TTCCTTGGAACTTAAAAAAAAAAAAAAAA  | AAACAAAAACAACCAACCAAAAATATATCT | L1PA10                 | GG            | GG          | AG        | GG                     | homopolymer & in/del        |
|                        |                  | chr21_34749366_NA17460       | TTCCTTGGAACTTAAAAAAAAAAAAAAAA  | AAACAAAAACAACCAACCAAAAATATATCT | L1PA10                 | GG            | GG          | AG        | GG                     | homopolymer & in/del        |
|                        |                  | chr21_34749366_NA17773       | TTCCTTGGAACTTAAAAAAAAAAAAAAAA  | AAACAAAAACAACCAACCAAAAATATATCT | L1PA10                 | GG            | GG          | AG        | GG                     | homopolymer & in/del        |
|                        |                  | chr3_38563723_NA17275        | TGTGCTGTGGGAGACAGTATGCGAGTTC   | TAAAAAATTAATAAATAAAATTGCCATATG | L1MB3                  | CC            | CC          | AC        | CC                     | repetitive element          |
|                        |                  | chr3_38564670_NA17156        | ACAACATCTGGCACTTGATGTCTGTCTCCT | CCCTCTGCTGGTCATTGTGCAGTTCTGGGA |                        | TT            | TT          | CT        | NN                     | in/del                      |
|                        |                  | chr7_150279372_NA17773       | ATGGTGGCCCTGGAGTCTCTAAGTTCC    | GGGCTCACTCTGGCCCGCTAGCAGCCTC   |                        | AA            | AA          | AG        | AA                     | in/del                      |
|                        |                  | chr7_150286149_NA17773       | CGCATGGCCTCGATGTCGTCGGCCGACG   | GGCGCGGCGCAGCTGGCGCAGCTTTCTCG  |                        | AA            | AA          | AG        | AA                     | low coverage                |
|                        |                  | chr7_150298286_NA17460       | GGGGAGAAAAGAGGCCCACTCTCCCCC    | CACACACCCCAAGCTGGCCCTCTGCTGC   |                        | TT            | TT          | CT        | TT                     | homopolymer                 |
|                        | ABI SOLiD only   | chr11_73842038_NA17460       | GAATACCTACTTACTACATAGGGTTGTT   | TGAGGGTTTTAAAGCTAAATGAATCAAG   | MIR                    | AA            | AA          | AA        | CC                     | repetitive element          |
|                        |                  | chr11_73843792_NA17460       | AGAACCCAAGGCTTTTATTTTTATTTT    | TCAAAATAGAAGTACCTTTTTCTTTTAT   |                        | TT            | TT          | TT        | CT                     |                             |
|                        |                  | chr21_34741405_NA17275       | CTAAGAAGGGTCTGGCTTACACAGGGGC   | ATGAGACGTGGCAGGCATAGCTGGGCTGCT |                        | CC            | CC          | CC        | TT                     |                             |
| chr21_34741865_NA17773 |                  | ACGGAGGCCCTCTCTATCTGCTGGGGCA | CCCTCCGGTGCCCGCTGGAAGGCAGAGC   |                                | GG                     | GG            | GG          | CG        | in/del                 |                             |
| chr21_34749352_NA17275 |                  | ACATCCTGCACATGTTCCCTGGAACTTA | AAAAAAAAAAAAAGAAACAAAAACAACCAA | L1PA10                         | AA                     | AA            | AA          | AT        | homopolymer & in/del   |                             |
| chr21_34774705_NA17156 |                  | AGAAAATGAAATTGAGGAGGGGACTCA  | TTTTTTTTTTTTTTTGGAGACAGAGTCTCA | AluSx                          | CC                     | CC            | CC          | CT        | homopolymer & in/del   |                             |
| chr21_34807310_NA17460 |                  | CCAAGATCAATGTTTTTCTTTATCC    | GATTTTAAATCAAGTACACTTTATTGAGG  |                                | TT                     | TT            | TT          | CT        |                        |                             |
| chr21_34807310_NA17773 |                  | CCAAGATCAATGTTTTTCTTTATCC    | GATTTTAAATCAAGTACACTTTATTGAGG  |                                | TT                     | TT            | TT          | CT        |                        |                             |
| chr3_38589927_NA17773  |                  | TTGCTGTGAGATCTCTGTTTTTCTTTT  | TTAAAAAATTTTCCCTCAGCAATTTGGA   | L1MEe                          | TT                     | TT            | TT          | CT        | homopolymer            |                             |
| chr3_38596373_NA17156  |                  | GCACTCCCGGCTTGCCTGCGCGCACGCG | GCGCACACACACACACACCCCCACACAC   | (CA) <sub>n</sub>              | CC                     | CC            | CC          | TT        | simple repeat & in/del |                             |
| chr3_38602169_NA17773  |                  | GGGTAGATGAGTGGATGGTGTGTGTGTG | CCCTTGCCAACTTACCACAAGTTGCCAA   |                                | GG                     | GG            | GG          | GT        | simple repeat & in/del |                             |
| chr3_38643193_NA17156  |                  | TCAGATCCCAGGGAGTTAAAAAAAAAAA | CCACCCAAAGAAAAGGTAATTAACCTGGA  |                                | AA                     | AA            | AA          | AC        | homopolymer            |                             |
| chr3_38645101_NA17156  |                  | TAGAGAGCCACACCCCGGAGTGAGGC   | AGAGACGGGCTCAGAGCAAGAAAAGCTGGC |                                | CC                     | CC            | CC          | TT        |                        |                             |
| chr7_150276467_NA17460 |                  | CCCCTTCTCCCTCCCCGCTCACCC     | TGTCCTGCGCCTGCGGAAGGACAACCTGC  |                                | TT                     | GT            | GT          | GG        |                        |                             |

|                        |                           |                              |                                |                                 |                                 |       |    |    |                             |                             |             |
|------------------------|---------------------------|------------------------------|--------------------------------|---------------------------------|---------------------------------|-------|----|----|-----------------------------|-----------------------------|-------------|
|                        |                           | chr7_150279376_NA17773       | TGCCCCCTGGAGTCTCTAAGTTCAGGG    | CTCACTCTGGCCCGCTAGCAGCCTCAGTT   |                                 | CC    | CC | CC | CG                          | in/del                      |             |
|                        |                           | chr7_150290648_NA17156       | ACTCACACTTACACACACACACGAGAGA   | AGAGAGAGAGAGAGAGAGAGAGAGAGGAGT  | (GA)n                           | CC    | CC | CC | CG                          | simple repeat & in/del      |             |
|                        |                           | chr7_150290648_NA17275       | ACTCACACTTACACACACACACGAGAGA   | AGAGAGAGAGAGAGAGAGAGAGAGAGGAGT  | (GA)n                           | CC    | CC | CC | CG                          | simple repeat & in/del      |             |
|                        |                           | chr7_150290648_NA17460       | ACTCACACTTACACACACACACGAGAGA   | AGAGAGAGAGAGAGAGAGAGAGAGAGGAGT  | (GA)n                           | CC    | CC | CC | CG                          | simple repeat & in/del      |             |
|                        | Roche 454 and Illumina GA | chr21_34741860_NA17156       | GCAGAACGGAGGCCCTCTATCTGCTG     | GGCAGCCCTCCGGTGCCCCGCTGGAAGGC   |                                 | GG    | CG | CG | NN                          | in/del                      |             |
|                        |                           | chr7_150276467_NA17460       | CCCCTTCTCCCTCCCCGCTCACCC       | TGTCCGTGCGCTGCGGAAGGACAACTTGC   |                                 | TT    | GT | GT | GG                          |                             |             |
|                        | Illumina GA and ABI SOLiD | chr2_223624619_NA17773       | ATAATCCTACCTGCAGAAAGACCCCCC    | CCGCCAGGCACAACGATTTTACAGACGAGG  |                                 | CC    | CC | CG | CG                          | homopolymer & in/del        |             |
|                        |                           | chr3_38564670_NA17275        | ACAACATCTGGCACTTGATGTCTGTCT    | CCCTCTGTGGTTCATTGTGCAGTTCTGGA   |                                 | TT    | TT | CT | CT                          | simple repeat & in/del      |             |
|                        |                           | chr3_38564670_NA17460        | ACAACATCTGGCACTTGATGTCTGTCT    | CCCTCTGTGGTTCATTGTGCAGTTCTGGA   |                                 | TT    | TT | CT | CT                          | simple repeat & in/del      |             |
|                        |                           | chr3_38564670_NA17773        | ACAACATCTGGCACTTGATGTCTGTCT    | CCCTCTGTGGTTCATTGTGCAGTTCTGGA   |                                 | TT    | TT | CT | CT                          | simple repeat & in/del      |             |
|                        |                           | chr3_38596386_NA17773        | GCGTGCGCGCACGCGCGCACACACAC     | CACACACCCCCACACACACCACACACACC   | (CA)n                           | AA    | AA | AC | AC                          | simple repeat & in/del      |             |
|                        |                           | chr3_38596396_NA17156        | ACGCGCGCGCACACACACACACACACC    | CACACACACCACACACACCAGGAGCCAGA   | (CA)n                           | CC    | CC | AA | AA                          | simple repeat & in/del      |             |
|                        |                           | chr3_38596400_NA17156        | GCGCGCACACACACACACACACCCAC     | CACACCACACACACCAGGAGCCAGAGTCA   | (CA)n                           | AA    | AA | CC | CC                          | simple repeat & in/del      |             |
|                        |                           | chr3_38638394_NA17275        | TTACTGAAGTGGGATAGCCCTGGGGTA    | CTCCTAGTGCCTACCTCTAGCTGCCTAC    | MIR                             | CC    | CC | CG | CG                          | repetitive element & in/del |             |
|                        | chr3_38638394_NA17773     | TTACTGAAGTGGGATAGCCCTGGGGTA  | CTCCTAGTGCCTACCTCTAGCTGCCTAC   | MIR                             | CC                              | CC    | CG | CG | repetitive element & in/del |                             |             |
|                        | All 3 NGS                 | chr11_73843968_NA17275       | TCAGAGTTCTGCTATACACAAATACGCA   | GTTTCAATGGTACTTCCAGGGACCGCATG   |                                 | TT    | GT | GT | GT                          |                             |             |
|                        |                           | chr11_73843968_NA17460       | TCAGAGTTCTGCTATACACAAATACGCA   | GTTTCAATGGTACTTCCAGGGACCGCATG   |                                 | TT    | GT | GT | GT                          |                             |             |
|                        |                           | chr21_34759676_NA17460       | ATGGGTAGGAAAGAACAATAAATCTACT   | GCACAATGTTGATATTTAAAGATAAACAT   |                                 | CC    | CT | CT | CT                          |                             |             |
|                        |                           | chr21_34807876_NA17156       | ATCTATCCAATCCAATTGCGTGTGAAC    | TCTACTATGAGCCATTGGTACCAGGAATC   |                                 | GG    | AG | AG | AG                          |                             |             |
|                        |                           | chr3_38596474_NA17156        | GGAACAGAGAAGGAAATGAGAGACAGC    | GGAATCCCCCTCTGTGCTGGAGATCATTG   |                                 | CC    | TT | TT | TT                          |                             |             |
|                        |                           | chr3_38639168_NA17156        | CAATCCCCCTCCACCCAGGCTGGTCTCT   | TCCCTCCCCGGCACTTGACGCTGGCCCC    |                                 | TT    | GT | GT | GT                          |                             |             |
|                        |                           | chr7_150284380_NA17773       | CAGGCGGTGGGAGCAGGGCCAGGAGCCC   | CCGAGGTAGCAGGGCAGCTCCCTTACATGA  |                                 | GG    | AG | AG | AG                          |                             |             |
|                        |                           | chr7_150293045_NA17773       | CAAGAGGCCAACAGTGAATGAGAGAGA    | GGAGGGAGAGACAGAGACAGGGAGAGAG    | GA-rich                         | AA    | AG | AG | AG                          |                             |             |
|                        | chr7_150293190_NA17156    | CAGGTTGAGGGGCCCAAGCTCAGACCC  | GACCCACAGAAGCAGCATCTCCAGACAGA  |                                 | TT                              | GT    | GT | GT |                             |                             |             |
|                        | False Negative            | Roche 454 only               | chr11_73843069_NA17275         | TAACTCACAACAAAATAATTTGTATTA     | TTTATGATTATGCCATGGAGTGTGAGGAC   |       | AT | TT | AT                          | AT                          | in/del      |
|                        |                           |                              | chr11_73845036_NA17460         | TAGGGAGACTGTCTCAAAAAAAAAAAAA    | AAAAGAAAAGAAAAGAAGTTTCTCACATCA  | AluSx | AG | GG | AG                          | NN                          | homopolymer |
|                        |                           |                              | chr21_34743289_NA17773         | CAGTGAAACAGTGTCAATTAATCCACCCC   | CACCCCTTACAACAGCCAAAAAGAAATCCA  |       | CT | TT | CT                          | CT                          |             |
|                        |                           |                              | chr21_34806395_NA17460         | AGTGTCAAATGCGTTGTTCCCTGGAGAG    | AAGGCTTATTTCCAGAAAAGTACTCTGACGT |       | AG | GG | AG                          | AG                          |             |
| chr21_34806395_NA17773 |                           |                              | AGTGTCAAATGCGTTGTTCCCTGGAGAG   | AAGGCTTATTTCCAGAAAAGTACTCTGACGT |                                 | AA    | GG | AA | AA                          | In/del                      |             |
| chr3_38622646_NA17773  |                           |                              | TAGATCTTCCCTGCGGACCTGAGGGTCT   | GGGGAGCAAGGGGGCAGAGGTCAACCCTCAC |                                 | GT    | GG | GT | GT                          |                             |             |
| chr3_38630647_NA17156  |                           |                              | CCCACCAGCCCTCTCCCTTGCCCCCT     | CCACGGGGTGGGGGAGTGTGTGGATAG     |                                 | CT    | CC | CT | CT                          | in/del                      |             |
| chr3_38633238_NA17275  |                           |                              | CAGGGGCAGAAAGAGCAAGGGTGGTGG    | TGAGAATCCTATCCCATCACCAGCCCCACT  |                                 | GT    | GG | GT | GT                          | in/del                      |             |
| chr7_150275327_NA17460 |                           |                              | CTGGACCAGACTCCAGGGCGTCCCCC     | ACCCACCTGCACCTCCCTCACCTGTTGAGC  |                                 | CT    | CC | CT | CT                          | homopolymer                 |             |
| chr7_150293045_NA17275 |                           | CAAGAGGCCAACAGTGAATGAGAGAGA  | GGAGGGAGAGACAGAGACAGGGAGAGAG   | GA-rich                         | AG                              | AA    | AG | AG | simple repeat               |                             |             |
| ABI SOLiD only         | chr11_73844514_NA17460    | TCTTGGCTTACTGCAACCTCCACCTCCC | GGTTCAAACAATTTCTCTGCTCAGCCTCC  | AluSx                           | AG                              | AG    | AG | GG | repetitive element          |                             |             |
|                        | chr7_150278902_NA17460    | AGAGGTTCCCTCTGCCACCCACTCTT   | CCAGCCTGCCACCCACTGGCCACGCTCTGG |                                 | CT                              | CC    | CT | CC | adjacent variants           |                             |             |

|                          |                        |                             |                               |                                |         |    |    |    |        |                    |
|--------------------------|------------------------|-----------------------------|-------------------------------|--------------------------------|---------|----|----|----|--------|--------------------|
|                          |                        | chr7_150278903_NA17460      | GAGGTTCCCCTGTCACCCCACTCTTC    | CAGCCTGCCACCCACTGGCCACGCTCTGGT |         | CG | CC | CG | CC     | adjacent variants  |
| All 3 NGS                |                        | chr7_150299914_NA17773      | CTGTGAGGACTGGCAGAGGAGGAGCCAC  | GCCCCATGGCGATGTGGGAGCACAGGTGT  |         | AC | AA | AA | AA     |                    |
|                          |                        | chr7_150275444_NA17773      | TGGAGAGGGGATGTTGAGGAGGCTGGG   | GTGGGGCGGGCATCGAGGAGCTCCTGG    |         | AG | GG | GG | GG     |                    |
|                          |                        | chr2_223624557_NA17275      | CAGGCAGCCTCAATCTTAGAAGGGTTA   | GCTGAAAGGGTCTCAAAGGTCACGTGGTT  |         | AG | AA | AA | AA     |                    |
| Variant Discrepant Calls | Roche 454 only         | chr21_34743289_NA17275      | CAGTGAACAGTGTCTTAATCCACCCC    | CACCCCTTACAACAGCCAAAAAGAAATCCA |         | CC | CT | CC | CC     |                    |
|                          |                        | chr3_38643196_NA17156       | GATCCCAGGGAGTTAAAAAACC        | CCCAAAGAAAGGTAATTAAGCTGGAGGG   |         | GG | AG | GG | GG     |                    |
|                          |                        | chr7_150279919_NA17460      | GGGCAAGGGGGCAAGGGAGGAGGGGAG   | TGCTGCGCCCTCAGAGCGAGCATCAGAGG  |         | CC | CG | CC | CC     |                    |
|                          |                        | chr7_150286470_NA17275      | GCGCCCGCCGACCGCACCGACTCCC     | GGCCGTCAGCGCCAGCAGCGGGCAGCTT   |         | AG | AA | AG | NN     |                    |
|                          |                        | chr7_150293045_NA17156      | CAAGAGGCCAACCCAGTGAATGAGAGAGA | GGAGGGAGAGAGACAGAGACAGGGAGAGAG | GA-rich | GG | AG | GG | GG     | simple repeat      |
|                          |                        | chr7_150293045_NA17460      | CAAGAGGCCAACCCAGTGAATGAGAGAGA | GGAGGGAGAGAGACAGAGACAGGGAGAGAG | GA-rich | GG | AG | GG | GG     | simple repeat      |
|                          | ABI SOLiD only         | chr11_73842457_NA17460      | CAGAGATACAGATACAGATACAGA      | ATATAGATATATAGATATATAGATATAGAT | (TA)n   | GG | GG | GG | GT     | simple repeat      |
|                          |                        | chr11_73843069_NA17460      | TAAGTACAACAAAATAATTTGTATTA    | TTTATGATTATGCCCATGGAGTGTGAGGAC |         | AT | AT | AT | AA     |                    |
|                          |                        | chr11_73845278_NA17275      | CAACATATTAATGTGGCAGTATATTTTC  | TAATGTTTGCAAAGTAAGATATTTTAGAA  | Arthur1 | AG | AG | AG | GG     | repetitive element |
|                          |                        | chr11_73845278_NA17460      | CAACATATTAATGTGGCAGTATATTTTC  | TAATGTTTGCAAAGTAAGATATTTTAGAA  | Arthur1 | AG | AG | AG | GG     | repetitive element |
|                          |                        | chr21_34746100_NA17460      | GTCCTGTCAGAGACTGGCCCCTGCCTCA  | TGAGCTGAGTGGCAACCCACTCACTCAA   |         | CT | CT | CT | CC     |                    |
|                          |                        | chr3_38592130_NA17156       | AGGGCCGTGGGACCACCCGTGGGGGCC   | CACGCTCTGCGGGCACTTTTGAGGAGGAT  |         | GG | GG | GG | CG     |                    |
|                          |                        | chr7_150279131_NA17773      | TGGCCGACAGTTGCCGAAGATGCTAGC   | TACATGAGGGCTGGGGCGTGGGCACGTGG  |         | AG | AG | AG | GG     |                    |
|                          |                        | chr7_150283286_NA17156      | AGGAGCCAGGCGCGGGTGAAGAGGGCCA  | GCCCCACGGTCCCAAAGCTTCTACTTCC   |         | AG | AG | AG | AA     |                    |
| Roche 454 and ABI SOLiD  | chr7_150298282_NA17156 | CTCTGGGGAGAAAAGAGGCCAGTCTCC | CCCTCACACCCCCAAGCTGGCCCTTCTG  |                                | TT      | CT | TT | CT | in/del |                    |

**Supplemental Table 13. Analysis of eleven heterozygous indels identified by ABI Sanger. Allele1 and Allele2 refer to the base calls detected at the locus. Homopolymer Length is the length of the homopolymeric region flanking the reported indel.**

| ABI SANGER     |         |                  |                 |                    |                 | Roche 454      |                  |                 |
|----------------|---------|------------------|-----------------|--------------------|-----------------|----------------|------------------|-----------------|
| NCBI36         | Sample  | Allele1          | Allele2         | Homopolymer Length | resolved by 454 | NCBI36         | Allele1          | Allele2         |
| chr21_34795794 | NA17773 | -                | T               | 5                  | no              |                |                  |                 |
| chr21_34806868 | NA17156 | -                | T               | 6                  | no              |                |                  |                 |
| chr2_223624624 | NA17773 | -                | GCC             |                    | yes             | chr2_223624624 | -                | GCC             |
| chr3_38633475  | NA17156 | -                | GAGGGCTGCAAGCTG |                    | yes             | chr3_38633476  | -                | GAGGGCTGCAAGCTG |
| chr3_38633475  | NA17275 | -                | GAGGGCTGCAAGCTG |                    | partial         | chr3_38633465  | A                | -               |
|                |         |                  |                 |                    |                 | chr3_38633469  | CTG              | GCAA            |
| chr3_38633475  | NA17460 | -                | GAGGGCTGCAAGCTG |                    | yes             | chr3_38633476  | -                | GAGGGCTGCAAGCTG |
| chr3_38638411  | NA17275 | CCTCCTAGCTGCCTAC | G               |                    | yes             | chr3_38638394  | CCTCCTAGCTGCCTAC | G               |
| chr3_38638411  | NA17773 | CCTCCTAGCTGCCTAC | G               |                    | yes             | chr3_38638394  | CCTCCTAGCTGCCTAC | G               |
| chr7_150282302 | NA17460 | -                | A               | 11                 | no              |                |                  |                 |
| chr7_150282302 | NA17773 | -                | A               | 11                 | no              |                |                  |                 |
| chr7_150299420 | NA17156 | -                | G               | 6                  | no              |                |                  |                 |

**Supplemental Table 14. Forty three additional indels not found by ABI Sanger and identified by Roche 454 in the 88-kb overlapping ABI Sanger sequences**

| Coord NCBI36   | Sample  | alt/ref                            | Total Reads | Alt reads | upstream sequence                                | downstream sequence                                 | repeat  |
|----------------|---------|------------------------------------|-------------|-----------|--------------------------------------------------|-----------------------------------------------------|---------|
| chr11_73841786 | NA17460 | -/A                                | 23          | 8         | GATTAGGCCACTGCATCCAGCCTGAGCCACAGAGCGAGACCCCTGTCT | AAAAAAAAAAAAATCTGCCTCAAGGTCTGTTTCTAGGAAACCAACTTCA   | AluJo   |
| chr21_34742194 | NA17773 | T/-                                | 24          | 15        | GGTTTGTGGCTGTGCTACTGCACCCTCTGCCTCTGTACGGCATGGTG  | CCTCCCTATGCATCTGTGTCTGAATTTCCCTCTCCGATAAGGACTCCAG   | MLT1C   |
| chr21_34749371 | NA17275 | A/-                                | 11          | 5         | CACATCCTGCATGTTCCTTGGAACTTAAAAAAAAAAAAAAAAAGAAAC | AAAACAACCAACCAAAAAATATCTAAAAATGCATCTGTTAGCAATTGAC   |         |
| chr21_34774705 | NA17156 | C/-                                | 25          | 14        | TATCTCTGCAAAGAGAGGAAAGAAAATGAAATTGAGGAGGGGGACTCA | TTTTTTTTTTTTTTTTGAGACAGAGTCTACTCTATTGCCAGGCTGGAG    | AluSx   |
| chr21_34774890 | NA17275 | GCCT/CACCA                         | 17          | 4         | TACAGGCGCACACCACCACACCTGTATTTTTGTAGAGATGGAGTTTT  | CCTTGTTAGCCAAGCTGGTCTCGAACTCTGACCTCAGGTGATCCACCTG   | AluSx   |
| chr21_34774898 | NA17275 | AGCCAA/GGTCAG                      | 17          | 4         | CACACCACCACACCTGTATTTTTGTAGAGATGGAGTTTTGCCTTGT   | GCCAAAGCTGGTCTCGAACTCTGACCTCAGGTGATCCACCTGCTTTGGTC  | AluSx   |
| chr21_34774884 | NA17773 | A/-                                | 12          | 3         | TGAGACTACAGGCGCACACCACCACACCTGTATTTTTGTAGAGATGG  | GTTTTGCCTTGTAGCCAAGCTGGTCTCGAACTCTGACCTCAGGTGATC    | AluSx   |
| chr21_34774890 | NA17773 | GCCT/CACCA                         | 13          | 4         | TACAGGCGCACACCACCACACCTGTATTTTTGTAGAGATGGAGTTTT  | CCTTGTTAGCCAAGCTGGTCTCGAACTCTGACCTCAGGTGATCCACCTG   | AluSx   |
| chr21_34774898 | NA17773 | AGCCAA/GGTCAG                      | 15          | 5         | CACACCACCACACCTGTATTTTTGTAGAGATGGAGTTTTGCCTTGT   | GCCAAAGCTGGTCTCGAACTCTGACCTCAGGTGATCCACCTGCTTTGGTC  | AluSx   |
| chr21_34774940 | NA17773 | GCTTTGGT/CGGC                      | 13          | 3         | CTTGTTAGCCAAGCTGGTCTCGAACTCTGACCTCAGGTGATCCACCT  | CCTTGCTCCCAAAGTCTGGGATTATAGGCATGAGCCACCATGCCTGA     | AluSx   |
| chr21_34807620 | NA17156 | CT/TC                              | 9           | 6         | GATGACCATAACCTACCACAGACAGGGTCTCTCTCTCTCTCTCTCT   | TTTTCCCTGTTCTTGCGCCAGCTGCCTGACAATTTGTGGGATTAAGCT    | (TC)n   |
| chr21_34807620 | NA17460 | TC/TC                              | 15          | 13        | GATGACCATAACCTACCACAGACAGGGTCTCTCTCTCTCTCTCTCT   | TTTTCCCTGTTCTTGCGCCAGCTGCCTGACAATTTGTGGGATTAAGCT    | (TC)n   |
| chr21_34807620 | NA17773 | CTTTTC/TCTTTT                      | 12          | 8         | GATGACCATAACCTACCACAGACAGGGTCTCTCTCTCTCTCTCTCT   | TTTTCCCTGTTCTTGCGCCAGCTGCCTGACAATTTGTGGGATTAAGCT    | (TC)n   |
| chr21_34807776 | NA17156 | -/ATCC                             | 21          | 6         | TATTTCTTTTCAGTGACTGCTCACTCTCTCTCTCTCTCTCTCTCTCT  | TCCATCCATCCATCCATCCATCCATCCATCCATCCATCCATCCAACTTTC  | (TCCA)n |
| chr3_38564678  | NA17156 | -<br>/TTTTCTACTCTCTTCT<br>CCCCTCCT | 42          | 31        | CGATTAGTTCAGACAACATCTGGCACTTGATGTCTGTCTTCCCTCCT  | CTGGTCATTGTGCAGTTCTGGAAATTA AAAAGGTGACAGCCAGGCTAAAA |         |
| chr3_38564674  | NA17275 | -<br>/TCCTTTTTCTACTCTC<br>TTCTCCCC | 52          | 38        | TGCTCGATTAGTTCAGACAACATCTGGCACTTGATGTCTGTCTTCCC  | CCTGCTGGTCATTGTGCAGTTCTGGAAATTA AAAAGGTGACAGCCAGGCT |         |
| chr3_38564678  | NA17460 | -<br>/TTTTCTACTCTCTTCT<br>CCCCTCCT | 60          | 42        | CGATTAGTTCAGACAACATCTGGCACTTGATGTCTGTCTTCCCTCCT  | CTGGTCATTGTGCAGTTCTGGAAATTA AAAAGGTGACAGCCAGGCTAAAA |         |
| chr3_38564678  | NA17773 | -<br>/TTTTCTACTCTCTTCT<br>CCCCTCCT | 52          | 39        | CGATTAGTTCAGACAACATCTGGCACTTGATGTCTGTCTTCCCTCCT  | CTGGTCATTGTGCAGTTCTGGAAATTA AAAAGGTGACAGCCAGGCTAAAA |         |
| chr3_38593427  | NA17773 | -/T                                | 33          | 7         | GAAGGGAGGCAGCATCTTCATGACGCACCCTGGGACCTGCACAGAGCC | CCTTTCCTGTGTCAGGGCTGGGCCAAGGCTGGACCTCGGGGTTCCCGGGTC |         |
| chr3_38596394  | NA17156 | CCCCACA/ACACACC                    | 24          | 12        | CACCTCCCGCTTGCCTGCGCGCACGCGCGCACACACACACACACAC   | CCCACACACACACACACACCCAGGAGCCAGAGTCAATGGGCTCAAGAGA   | (CA)n   |
| chr3_38596370  | NA17773 | GCGCGCGC/-                         | 22          | 14        | GACTTCCCTCATGAATCCCTGTGGCACTCCCGCTTGCCTGCGCGCAC  | CGCGCGCACACACACACACACACCCACACACACACACACCCAGGA       | (CA)n   |
| chr3_38596394  | NA17773 | C/ACA                              | 26          | 13        | CACCTCCCGCTTGCCTGCGCGCACGCGCGCGCACACACACACACAC   | CCCACACACACACACACACCCAGGAGCCAGAGTCAATGGGCTCAAGAGA   | (CA)n   |
| chr3_38599800  | NA17156 | T/-                                | 15          | 3         | GGGAGGGGGCTGTGTGGGCTGGCATTAGCTCCCTCTCCAGCAGCCTC  | AATTTTCTCATCCCCAGGCAGATCTGCTGGGAAATCGCAGGGCTCCGTGT  |         |
| chr3_38602134  | NA17156 | GGTAGCTGGGTAGA/T<br>GTGTGTGTGTGTG  | 13          | 5         | GGTAGATGGATTGATAGAAGGGTAAGTAAATGGATAAATGGATGGGTG | GTAGCTGGGTAGATGAGTGGATGGTGTGTGTGTGGCCCTTGCCAACTTA   | (TGGA)n |
| chr3_38602154  | NA17156 | GATG/TGTGT                         | 17          | 10        | GGTAAGTAAATGGATAAATGGATGGGTGGGTAGCTGGGTAGATGAGTG | ATGGTGTGTGTGTGGCCCTTGCCAACTTACCACAAGGTTGCCAATGACC   | (TGGA)n |
| chr3_38602154  | NA17460 | GATG/TGTGT                         | 22          | 9         | GGTAAGTAAATGGATAAATGGATGGGTGGGTAGCTGGGTAGATGAGTG | ATGGTGTGTGTGTGGCCCTTGCCAACTTACCACAAGGTTGCCAATGACC   | (TGGA)n |
| chr3_38602134  | NA17773 | GGTAGCTGGGTAGA/T<br>GTGTGTGTGTGTG  | 16          | 4         | GGTAGATGGATTGATAGAAGGGTAAGTAAATGGATAAATGGATGGGTG | GTAGCTGGGTAGATGAGTGGATGGTGTGTGTGTGGCCCTTGCCAACTTA   | (TGGA)n |



|                |         |            |    |    |                                                    |                                                         |         |
|----------------|---------|------------|----|----|----------------------------------------------------|---------------------------------------------------------|---------|
| chr3_38602154  | NA17773 | GATG/TGTGT | 18 | 11 | GGTAAGTAAATGGATAATTGGATGGGTGGGTAGCTGGGTAGATGAGTG   | ATGGTGTGTGTGTGGCCCTTGGCCAACCTACCACAAGGTTGCCAATGACC      | (TGGA)n |
| chr3_38602661  | NA17460 | -/C        | 25 | 12 | AGCTCCTGCCTGAAAGCCCAAGGAGCCCTTGGAGGGCACTGACACCTA   | TCCCCCCCGCCATTTCTCCAGAGCACCCACTACTGTTCTCTCCACAG         |         |
| chr3_38624928  | NA17275 | T/-        | 28 | 18 | TGCCTCTGGCCTTCTTCTGTTCTCTGAAGACATCCTGCTGCCAGTG     | CCCCATGCTCTCAGAAGACACGGGAAGCCCTGGGCAGGGCCTCAGCTCTC      |         |
| chr3_38624928  | NA17773 | T/-        | 33 | 16 | TGCCTCTGGCCTTCTTCTGTTCTCTGAAGACATCCTGCTGCCAGTG     | CCCCATGCTCTCAGAAGACACGGGAAGCCCTGGGCAGGGCCTCAGCTCTC      |         |
| chr3_38638341  | NA17460 | -/A        | 60 | 16 | CAGAAGCAGTTTCTGGAACCTGTGCAATGGTTATAGGAGGCAGGACTT   | GGAAAAAAGGAGCAGCAGAGTGTGTTACTGAAGTGGGGATAGCCCTGGGG      |         |
| chr3_38643195  | NA17275 | CACCC/GCCG | 27 | 13 | CTTGGGCTGCCTAAGTCTTCAGATCCCAGGGAGTTTAAAAAAAAC      | ACCCAAAGAAAAGGTAATTAAGTCTGGAGGGTATTTTCATGTGTTGTG        |         |
| chr3_38643195  | NA17773 | CACCC/GCCG | 31 | 13 | CTTGGGCTGCCTAAGTCTTCAGATCCCAGGGAGTTTAAAAAAAAC      | ACCCAAAGAAAAGGTAATTAAGTCTGGAGGGTATTTTCATGTGTTGTG        |         |
| chr7_150277455 | NA17773 | ACT/-      | 20 | 7  | ACAGTAGTGAATCAAACCAGCATTTTTTTTTTTTTTTTTTTTTTTTTT   | CTGAAAGAACATACAGTAGTATAGCTTAGCACAGCACAGAACAGAAATGC      |         |
| chr7_150280333 | NA17773 | -/CTCTCTTT | 30 | 10 | TGCAGCTGCCTTGCCACCATGTCTCTCTCCACTGTCTTCTCTCTTT     | TCTCTCTCTCTTTTTCTGTCTCTCTCCACCCCTCCACCCACT              | (TC)n   |
| chr7_150286415 | NA17275 | A/GAC      | 6  | 2  | AGCGACTCGCTGCTGGGTGCCGCGGGCGTCAGGTCCACGTCCACCACC   | CGGCCCCCGGGCGCCCGCGCCCGCCGCGCCCGCCGACCGCACCAGCAGAC      | GC_rich |
| chr7_150290675 | NA17156 | -/A        | 12 | 5  | CTTACACACACACAGAGAGACAGAGAGAGAGAGAGAGAGAGAGAGAG    | AGTGACTGCTGGCCCTTCTCTTTGTGCGAGATTAAGAAATTTTCTTTT        |         |
| chr7_150290653 | NA17460 | -/AG       | 13 | 3  | CAGCACAAGCCTGTAACCTCACACTTACACACACACACAGAGAGACAGAG | GAGAGAGAGAGAGAGAGAGAGAGAGAGGAGTACTGCTGGCCCTTCTCTTTGTGCG | (GA)n   |
| chr7_150298286 | NA17156 | TC/-       | 5  | 2  | CCACCAGGAAGCCACTCTGGGGAGAAAAGAGGCCAGTCTCCCCC       | CACACACCCCAAGCTGGCCCTTGTGTCGCCCATGGCCCCCTCCCCAG         |         |
| chr7_150298336 | NA17275 | -/C        | 5  | 2  | ACACACCCCAAGCTGGCCCTTCTGCTGCCCATGGCCCCCTCCCCA      | AGCCCAAGGCCACCATCAAAGTCTGCTCCCATCTCAGACAGCTCTCGCA       |         |
| chr7_150298336 | NA17460 | -/C        | 3  | 2  | ACACACCCCAAGCTGGCCCTTCTGCTGCCCATGGCCCCCTCCCCA      | AGCCCAAGGCCACCATCAAAGTCTGCTCCCATCTCAGACAGCTCTCGCA       |         |
| chr7_150299654 | NA17275 | -/A        | 26 | 14 | GGGTGGGGGACAATGGGAGAGAGGGAGAGAGGCAAGGAGCAAGTTCC    | GGGTGCTGAGGCGAGGGAAGAAGACAGGAGGAGGACCAGAGAGGAGATA       |         |

**Supplemental Table 15.** Primer pairs used for long-range PCR amplification of the targeted interval (Perlegen Sciences mapped to NCBI build 36) and PCR amplification around discordant calls for validation by independent sequencing.

| Application |                                  | Sequence                          | NCBI36 coordinates       | Amplicon size (bp) |
|-------------|----------------------------------|-----------------------------------|--------------------------|--------------------|
| LR-PCR      | LR-1527027_1                     | GAGGGGACAGAAGACCAGGCTGGCTAATG     | chr7:150284619-150284648 | 3087               |
|             | LR-1527027_2                     | GGGCTGTCATCATGTTTCATCCTCAATTTGAG  | chr7:150287673-150287705 |                    |
|             | LR-1977_1                        | GTAGTACCTTAGTACCCTTGCAGCCCGTTTC   | chr21:34657259-34657290  | 14227              |
|             | LR-1977_2                        | CAAGATAGCAGGGCAGGGAATAAAGATCAGTA  | chr21:34671453-34671485  |                    |
|             | LR-1983_1                        | TGTGTCTGAGGATTGTCTGGCGTGAGG       | chr21:34735911-34735938  | 10796              |
|             | LR-1983_2                        | GCTCATTGGCATCTGTTTCATTGGAGTAAGCAG | chr21:34746674-34746706  |                    |
|             | LR-1985_1                        | GGGACCCACATTGCTCTTAGAACTATTC      | chr21:34760612-34760640  | 14476              |
|             | LR-1985_2                        | CTTGTAGCTGAACCCAACGTATCACAACTTA   | chr21:34775055-34775087  |                    |
|             | LR-1986_1                        | TGATACAGTTGGGTTGAGCTACAAGGGTAAC   | chr21:34775063-34775094  | 10469              |
|             | LR-1986_2                        | CTTCTCTTTGCTAGTTGAACCCGCTACTACAT  | chr21:34785499-34785531  |                    |
|             | LR-1987_1                        | CAACTAGCAAAGAGAAGACAGCGTCCTT      | chr21:34785515-34785543  | 9922               |
|             | LR-1987_2                        | TATAGTGGATAACCTTGACTTACCCGGTCCTA  | chr21:34795404-34795436  |                    |
|             | LR-1988_1                        | CAGAGAGTAGGACCGGGTAAGTCAAGGTTATC  | chr21:34795398-34795430  | 4624               |
|             | LR-1988_2                        | CCACGCCAGGTCTTCTTTAGGATCTAGTCT    | chr21:34799991-34800021  |                    |
|             | LR-1989_1                        | ATTACTGTAGCTCAAACGAGGCCAGACTAGAT  | chr21:34799969-34800001  | 6410               |
|             | LR-1989_2                        | CGCATTTGACACTTGACTGGGATACACTA     | chr21:34806349-34806378  |                    |
|             | LR-1990_1                        | CGGTAGTGTATCCAGTCAAGTGTCAAA       | chr21:34806347-34806375  | 12103              |
|             | LR-1990_2                        | CCGTAAGTAGTGTCTATGTATTGGCAACTGTT  | chr21:34818417-34818449  |                    |
|             | LR-240580_1                      | GGGCCAGGCTAGGTTTGTATTGCGATGTCAG   | chr11:73836950-73836982  | 9001               |
|             | LR-240580_2                      | GATCTAACACGAGAGGGCTGGGACGGTGGA    | chr11:73845920-73845950  |                    |
|             | LR-240581_1                      | CCCAGCCCTCTCGTGTAGATCATAGACA      | chr11:73845929-73845958  | 8458               |
|             | LR-240581_2                      | CACAGAGCCAAGCATAACAGCCAAGATTAGAAT | chr11:73854354-73854386  |                    |
|             | LR-240582_1                      | CTTTCATGATTCTAATCTTGGCTGTATGCTTG  | chr11:73854347-73854379  | 8219               |
|             | LR-240582_2                      | CATCCTCCACCCACATTCCTTAGTTCT       | chr11:73862538-73862565  |                    |
|             | LR-382423_1                      | ATAGAGATTCTCATAGTCTTGGGCTACACTG   | chr2:223616214-223616246 | 11004              |
|             | LR-382423_2                      | CCTTCTAGGTCTCAGCTACGTGACGAAAT     | chr2:223627188-223627217 |                    |
|             | LR-54275_1                       | CCAAGGATGAGGGAGTCTGCGTCACAAG      | chr7:150269610-150269638 | 11143              |
|             | LR-54275_2                       | TGGTCATCTACACGGCTGTCTTACACCCTAC   | chr7:150280720-150280752 |                    |
|             | LR-54276_1                       | GCAGCCGAGTAGGGTGTGAAGACAGCCGTGTA  | chr7:150280713-150280745 | 4905               |
|             | LR-54276_2                       | CTGTGCAGGGCCTGGTCTCCACTCTCGATCTA  | chr7:150285585-150285617 |                    |
|             | LR-54277_1                       | TCTAGAATCCAGTCATCATAAACCGCCATA    | chr7:150286689-150286719 | 11487              |
|             | LR-54277_2                       | AAACTCCTCCCTTAGAGAACTTCTGCGTTTAG  | chr7:150298143-150298175 |                    |
|             | LR-54278_1                       | GAGTTTCAGGAACGCTTCAGGGAAATACCAAC  | chr7:150298170-150298202 | 3423               |
|             | LR-54278_2                       | GTTTCGCTCACAGCAAATCAGGGTTCTAACTG  | chr7:150301561-150301592 |                    |
|             | LR-721496_1                      | CTGGACGTGCATGTAAATCTTGATTGGTTA    | chr3:38553978-38554010   | 11101              |
|             | LR-721496_2                      | ACCCATGCCCTGACAGATCTAGTTCT        | chr3:38565051-38565078   |                    |
|             | LR-721498_1                      | TGACATTCTGAGGGACAATTGCAGGAATAGAC  | chr3:38575485-38575517   | 8720               |
|             | LR-721498_2                      | GAGCCCTAGTGACGTGTTTCAGTTGCCTAGA   | chr3:38584174-38584204   |                    |
|             | LR-721499_1                      | CACCTCCTCATTTCTGCCTCAACTCAA       | chr3:38584039-38584066   | 11568              |
|             | LR-721499_2                      | CAAACCTGATGCAGGACTAACCCACTACCTC   | chr3:38595574-38595606   |                    |
|             | LR-721500_1                      | CTCAGGGGTTGCCAACTCCAATGCTTAC      | chr3:38595323-38595351   | 11083              |
|             | LR-721500_2                      | TTCCTGAGTCTAGCTCCACCTGATAACTGCC   | chr3:38606373-38606405   |                    |
| LR-721501_1 | CAGCTGTTTTGGTGGTGAGATGGCAGTTATC  | chr3:38606353-38606384            | 11969                    |                    |
| LR-721501_2 | CCAGATTGGGAGGTAGGGGCTGAAGACTTACT | chr3:38618289-38618321            |                          |                    |
| LR-721502_1 | CCCAACCCTGTGCTTTGTTTTAGACTAGAAC  | chr3:38618395-38618427            | 11967                    |                    |
| LR-721502_2 | CATTGTCTCGTGTGTGAATTCCTTGTTACA   | chr3:38630329-38630361            |                          |                    |

|                           |                      |                                  |                          |       |
|---------------------------|----------------------|----------------------------------|--------------------------|-------|
|                           | LR-721503_1          | TGTAACAAGGGAAATTCACACACGAGACA    | chr3:38630330-38630359   | 11821 |
|                           | LR-721503_2          | TAACAAATAATTCCCTCCCTCCTGTACGGTAG | chr3:38642118-38642150   |       |
|                           | LR-721504_1          | ACCGTCGAATGTGGGGAGACTACCGTA      | chr3:38642100-38642127   | 11891 |
|                           | LR-721504_2          | TCAGGGCACACAGAATTTTGGAGAATGTCTAA | chr3:38653958-38653990   |       |
|                           | LR-721505_1          | ATTGTAAGACCACAGTCGCTCATCCCCTAGAT | chr3:38653478-38653510   | 11811 |
|                           | LR-721505_2          | GGCTCTCGACCTCTGTGTTATTGATCGTC    | chr3:38665258-38665288   |       |
|                           | LR-778623_1          | ATGGATACAGGCCCTAAATTTGAGAGTCTAT  | chr21:34746238-34746269  | 3341  |
|                           | LR-778623_2          | AGGATGATTTCTGATGGCATATTTAGGTAAGA | chr21:34749546-34749578  |       |
|                           | LR-778624_1          | CAGCTGAGGAATAGGCCACTTTTATCAGATAG | chr21:34749486-34749518  | 11646 |
|                           | LR-778624_2          | ACTTATTCTCCTGCTTACCTTCCTAGTCCAA  | chr21:34761099-34761131  |       |
| False positive Validation | FP1-F                | CAGTGTTCTACCCCCCTCTG             | chr21:34759544+34759840  | 297   |
|                           | FP1-R                | CTGGTTCTCTGGCTGGGTAA             |                          |       |
|                           | FP2-F                | GCTCACTCCTCTTCTCCAA              | chr21:34807745+34808040  | 296   |
|                           | FP2-R                | GAATCGTTGCCAGCTACTCC             |                          |       |
|                           | FP3-F                | TCAATGGGCTCAAGAGAAGG             | chr3:38596428+38596733   | 306   |
|                           | FP3-R                | GTTGAGTCAGGCCATCTTG              |                          |       |
|                           | FP4-R                | GAGGATGGTGCACATGATGA             | chr3:38638951+38639257   | 307   |
|                           | FP4-F                | CCCTACCAGCAGTGTGGTTT             |                          |       |
|                           | FP5-F                | GGCTGTGCAGTGTCAAGTTA             | chr7:150292849+150293143 | 287   |
|                           | FP5-R                | GGAGGCAGGAGCTTAGGACT             |                          |       |
| FP67-F                    | GAGTTAGGGAGCCCAAGAGG | chr7:150293004+150293290         | 271                      |       |
| FP67-R                    | CCCCAAGACCCTATAAATG  |                                  |                          |       |
| False Negative Validation | FN1-F                | AGGCAGAAGACAAAGGCAAG             | chr7:150299734+150300033 | 300   |
|                           | FN1-R                | GCAGAGTCCAGTGGTGTGAG             |                          |       |
|                           | FN2-F                | GGGCTAGGAATGGAAGAAGG             | chr7:150275218+150275518 | 301   |
|                           | FN2-R                | TCCAACATTTTCAGCTTCTGG            |                          |       |
|                           | FN3-F                | GGAACAAAACCTGCCATA               | chr2:223624363+223624672 | 310   |
|                           | FN3-R                | TTAACCTCTCCGCACCTCAC             |                          |       |
